# Supplementary material
Source: PubMed Central journal article supplement (PMC4586863)

**Requirement for transient metal ions revealed through computational analysis for a DNA  
polymerase going in reverse**

Lalith Perera<sup>a,1</sup>, Bret D. Freudenthal<sup>a</sup>, William A. Beard<sup>a</sup>, David D. Shock<sup>a</sup>, Lee G. Pedersen<sup>a,b</sup>, and  
Samuel H. Wilson<sup>a</sup>

<sup>a</sup>Genome Integrity and Structural Biology Laboratory, National Institute of Environmental Health  
Sciences, National Institutes of Health, Research Triangle Park, NC 27709-2233 and <sup>b</sup>Department of  
Chemistry, CB 3290, University of North Carolina at Chapel Hill, NC 27599

<sup>1</sup>To whom correspondence should be address. Email: pereral2@niehs.nih.gov.

## Supplemental Appendix

### Supplemental Materials and Methods

**Unconstrained Optimization of the  $\text{Na}_c\text{Mg}_n\text{Mg}_p$  Configuration at  $\text{P}_\alpha\text{-O}_\beta = 1.7 \text{ \AA}$ .** Unconstrained optimization of the original  $\text{Na}_c\text{Mg}_n\text{Mg}_p$  system was carried out to check whether the removal of constraints brings the system back to its starting configuration. The optimized system, after the removal of constraints, landed in a configuration near the reactant state of the system as indicated in Figure S1 (open triangle).

**CM5 Charges for Quantum System.** As described in the main text, the QM atom charges are calculated using the CM5 charge model (35) for each system at each selected geometry along the reaction path. The charges are given in Table S1A-D and the atom identities are given in Table S1E. The charge variations during the reaction profiles are illustrated in Figure S2.

**Table S1. Initial CM5 charges (in electron units) on QM atoms and their variations along the reaction path.**

(A) CM charges for the  $\text{Na}_c\text{Mg}_n\text{Mg}_p$  system. Index is the atom identification;  $C_{is}$  is the initial charge;  $(C_{cs}-C_{is})$  is the difference between the charges of the current systems (cs) and the initial system (is).

| Index | $C_{is}$ | $(C_{cs}-C_{is}) \cdot 10^{-2}$ along the reaction coordinate -----> |      |      |      |      |      |      |      |      |      |      |      |      |  |
|-------|----------|----------------------------------------------------------------------|------|------|------|------|------|------|------|------|------|------|------|------|--|
| 1     | 0.333    | 0.0                                                                  | 0.1  | 0.1  | 0.3  | 0.2  | 0.2  | 0.3  | 0.3  | 0.4  | 0.4  | 0.5  | 0.5  | 0.5  |  |
| 2     | -0.582   | 0.1                                                                  | 0.2  | 0.3  | 0.1  | 0.4  | 0.5  | 0.6  | 0.6  | 0.7  | 0.7  | 0.8  | 0.9  | 0.9  |  |
| 3     | 0.382    | 0.0                                                                  | 0.1  | 0.3  | -0.2 | 0.5  | 0.5  | 0.6  | 0.6  | 0.7  | 0.7  | 0.8  | 0.8  | 0.8  |  |
| 4     | 0.416    | 0.0                                                                  | 0.0  | -0.1 | 0.3  | 0.0  | 0.0  | 0.0  | 0.0  | 0.1  | 0.1  | 0.2  | 0.2  | 0.2  |  |
| 5     | -0.589   | 0.0                                                                  | 0.0  | -0.1 | 0.1  | -0.1 | 0.0  | 0.0  | 0.0  | 0.0  | 0.0  | 0.1  | 0.1  | 0.2  |  |
| 6     | 0.378    | 0.0                                                                  | 0.0  | 0.0  | 0.0  | 0.0  | 0.1  | 0.1  | 0.1  | 0.2  | 0.2  | 0.2  | 0.3  | 0.3  |  |
| 7     | 0.327    | 0.0                                                                  | 0.0  | -0.1 | -0.2 | -0.1 | -0.1 | -0.1 | 0.0  | -0.1 | -0.1 | -0.1 | -0.1 | 0.0  |  |
| 8     | -0.581   | 0.0                                                                  | 0.0  | -0.1 | 0.0  | -0.1 | -0.1 | 0.0  | 0.0  | 0.1  | 0.1  | 0.1  | 0.2  | 0.2  |  |
| 9     | 0.389    | 0.0                                                                  | -0.1 | -0.2 | -0.2 | -0.2 | -0.2 | -0.2 | -0.2 | -0.1 | -0.1 | -0.1 | -0.1 | -0.1 |  |
| 10    | 0.321    | 0.0                                                                  | 0.0  | 0.0  | 0.0  | 0.0  | 0.0  | 0.0  | 0.1  | 0.1  | 0.1  | 0.1  | 0.2  | 0.3  |  |
| 11    | 0.092    | 0.0                                                                  | 0.0  | 0.0  | 0.0  | -0.1 | -0.1 | -0.1 | -0.1 | -0.2 | -0.2 | -0.2 | -0.3 | -0.3 |  |
| 12    | -0.242   | 0.0                                                                  | 0.0  | 0.0  | 0.0  | 0.0  | 0.0  | 0.0  | 0.0  | 0.0  | 0.0  | 0.0  | -0.1 | -0.1 |  |
| 13    | 0.095    | 0.0                                                                  | 0.0  | 0.0  | 0.0  | 0.0  | 0.0  | 0.0  | 0.0  | 0.1  | 0.1  | 0.1  | 0.1  | 0.0  |  |
| 14    | 0.117    | 0.0                                                                  | 0.0  | 0.0  | 0.0  | 0.0  | 0.0  | 0.0  | 0.0  | -0.1 | -0.1 | -0.1 | -0.2 | -0.3 |  |
| 15    | 0.279    | 0.0                                                                  | 0.0  | 0.0  | 0.1  | 0.1  | 0.2  | 0.2  | 0.2  | 0.4  | 0.5  | 0.5  | 0.5  | 0.4  |  |
| 16    | -0.427   | 0.0                                                                  | -0.1 | -0.2 | -0.3 | -0.4 | -0.5 | -0.6 | -0.8 | -0.8 | -1.0 | -1.3 | -1.7 | -2.1 |  |
| 17    | -0.427   | 0.0                                                                  | -0.1 | 0.2  | 0.2  | 0.2  | 0.3  | 0.4  | 0.6  | 0.6  | 0.8  | 1.1  | 1.4  | 2.0  |  |
| 18    | 0.103    | 0.0                                                                  | 0.0  | 0.0  | 0.0  | 0.0  | 0.0  | 0.0  | 0.0  | -0.1 | -0.1 | -0.1 | -0.1 | -0.1 |  |
| 19    | -0.243   | 0.0                                                                  | 0.0  | 0.0  | 0.0  | 0.0  | -0.1 | -0.1 | -0.1 | -0.1 | -0.1 | -0.2 | -0.2 | -0.2 |  |
| 20    | 0.092    | 0.0                                                                  | 0.0  | -0.1 | -0.1 | -0.1 | -0.1 | -0.2 | -0.2 | -0.3 | -0.3 | -0.4 | -0.4 | -0.5 |  |
| 21    | 0.101    | 0.0                                                                  | 0.0  | 0.0  | 0.0  | 0.0  | 0.0  | 0.0  | 0.0  | 0.0  | 0.0  | 0.0  | 0.0  | -0.1 |  |
| 22    | 0.294    | 0.0                                                                  | 0.0  | 0.0  | 0.0  | 0.0  | 0.0  | 0.0  | -0.1 | -0.1 | -0.1 | -0.2 | -0.2 | -0.2 |  |
| 23    | -0.414   | 0.0                                                                  | 0.1  | 0.2  | 0.3  | 0.4  | 0.5  | 0.7  | 0.9  | 1.1  | 1.4  | 1.7  | 2.1  | 2.5  |  |
| 24    | -0.423   | -0.1                                                                 | -0.2 | -0.3 | -0.4 | -0.5 | -0.6 | -0.8 | -1.0 | -1.2 | -1.5 | -1.7 | -2.1 | -2.6 |  |
| 25    | 0.324    | 0.0                                                                  | 0.0  | 0.0  | 0.0  | 0.0  | 0.0  | 0.0  | 0.0  | -0.1 | -0.1 | -0.1 | -0.1 | -0.2 |  |
| 26    | -0.588   | 0.0                                                                  | -0.1 | 0.0  | 0.0  | 0.0  | 0.0  | -0.1 | -0.1 | -0.1 | -0.1 | -0.2 | -0.2 | -0.3 |  |
| 27    | 0.385    | 0.0                                                                  | 0.0  | 0.0  | 0.0  | 0.0  | 0.0  | 0.0  | 0.0  | 0.0  | 0.0  | -0.1 | -0.1 | -0.1 |  |
| 28    | 0.416    | 0.0                                                                  | 0.0  | 0.0  | 0.0  | 0.0  | 0.0  | 0.0  | 0.0  | 0.0  | 0.0  | 0.0  | 0.0  | -0.1 |  |
| 29    | -0.590   | 0.0                                                                  | 0.1  | 0.0  | 0.0  | 0.0  | 0.0  | 0.0  | 0.0  | 0.1  | 0.1  | 0.1  | 0.1  | 0.1  |  |
| 30    | 0.363    | 0.0                                                                  | 0.0  | 0.0  | -0.1 | -0.1 | -0.1 | -0.1 | -0.1 | -0.1 | -0.1 | -0.2 | -0.2 | -0.3 |  |
| 31    | 0.362    | 0.0                                                                  | -0.1 | -0.1 | -0.1 | -0.1 | -0.1 | -0.1 | -0.1 | -0.1 | -0.1 | -0.2 | -0.2 | -0.3 |  |
| 32    | -0.578   | 0.0                                                                  | 0.0  | 0.1  | 0.1  | 0.2  | 0.2  | 0.3  | 0.3  | 0.4  | 0.4  | 0.5  | 0.6  | 0.6  |  |
| 33    | 0.325    | 0.0                                                                  | 0.0  | 0.0  | 0.0  | 0.0  | 0.0  | 0.0  | 0.0  | 0.0  | 0.0  | 0.0  | 0.0  | -0.1 |  |
| 34    | 0.317    | 0.0                                                                  | 0.0  | 0.0  | 0.0  | 0.0  | 0.0  | 0.0  | 0.0  | 0.0  | 0.0  | 0.0  | 0.0  | 0.0  |  |
| 35    | 0.093    | 0.0                                                                  | 0.0  | 0.0  | -0.1 | -0.1 | -0.1 | -0.2 | -0.2 | -0.2 | -0.3 | -0.3 | -0.4 | -0.5 |  |
| 36    | -0.245   | 0.0                                                                  | 0.0  | 0.0  | 0.0  | 0.0  | -0.1 | -0.1 | -0.1 | -0.2 | -0.2 | -0.3 | -0.3 | -0.3 |  |
| 37    | 0.109    | 0.0                                                                  | 0.0  | 0.0  | 0.0  | 0.0  | -0.1 | -0.1 | -0.1 | -0.1 | -0.2 | -0.2 | -0.2 | -0.2 |  |
| 38    | 0.092    | 0.0                                                                  | 0.0  | 0.0  | 0.0  | 0.0  | -0.1 | -0.1 | -0.1 | -0.2 | -0.2 | -0.2 | -0.3 | -0.3 |  |
| 39    | 0.267    | 0.0                                                                  | 0.0  | 0.0  | 0.0  | 0.0  | 0.0  | 0.0  | 0.0  | -0.1 | -0.1 | -0.1 | -0.2 | -0.2 |  |
| 40    | -0.440   | 0.0                                                                  | 0.1  | 0.0  | 0.0  | -0.1 | -0.1 | -0.1 | -0.2 | -0.3 | -0.4 | -0.4 | -0.6 | -0.7 |  |
| 41    | -0.430   | 0.1                                                                  | 0.0  | 0.1  | 0.1  | 0.2  | 0.3  | 0.4  | 0.5  | 0.6  | 0.8  | 1.0  | 1.2  | 1.6  |  |
| 42    | 0.361    | 0.0                                                                  | 0.0  | 0.0  | 0.0  | -0.1 | -0.1 | -0.1 | -0.1 | -0.1 | -0.1 | -0.1 | -0.2 | -0.2 |  |
| 43    | -0.484   | -0.1                                                                 | -0.1 | -0.1 | -0.1 | -0.1 | -0.1 | -0.1 | -0.1 | -0.1 | -0.1 | -0.1 | -0.2 | -0.3 |  |
| 44    | 0.498    | 0.0                                                                  | -0.1 | -0.2 | -0.2 | -0.3 | -0.4 | -0.4 | -0.5 | -0.6 | -0.7 | -0.8 | -1.0 | -1.3 |  |
| 45    | -0.480   | 0.0                                                                  | -0.1 | -0.1 | -0.1 | -0.2 | -0.2 | -0.3 | -0.3 | -0.4 | -0.4 | -0.5 | -0.5 | -0.7 |  |
| 46    | -0.586   | -0.1                                                                 | -0.2 | -0.2 | -0.3 | -0.4 | -0.5 | -0.7 | -0.7 | -0.9 | -1.1 | -1.2 | -1.4 | -2.1 |  |
| 47    | -0.306   | 0.0                                                                  | -0.1 | -0.1 | -0.1 | -0.1 | -0.2 | -0.2 | -0.2 | -0.3 | -0.4 | -0.4 | -0.4 | -0.4 |  |
| 48    | -0.054   | 0.0                                                                  | 0.0  | -0.1 | -0.1 | -0.1 | -0.2 | -0.2 | -0.2 | -0.3 | -0.3 | -0.4 | -0.4 | -0.3 |  |
| 49    | 0.123    | 0.0                                                                  | 0.0  | -0.1 | -0.1 | -0.1 | -0.1 | -0.2 | -0.2 | -0.2 | -0.3 | -0.3 | -0.4 | -0.5 |  |
| 50    | 0.125    | 0.0                                                                  | 0.0  | 0.0  | -0.1 | -0.1 | -0.1 | -0.1 | -0.1 | -0.2 | -0.2 | -0.2 | -0.2 | -0.2 |  |

|     |        |      |      |      |      |      |      |      |      |      |      |      |      |       |
|-----|--------|------|------|------|------|------|------|------|------|------|------|------|------|-------|
| 51  | 0.016  | 0.0  | 0.0  | -0.1 | -0.1 | -0.1 | -0.2 | -0.2 | -0.3 | -0.3 | -0.4 | -0.5 | -0.6 | -0.9  |
| 52  | 0.125  | 0.0  | 0.0  | 0.0  | -0.1 | -0.1 | -0.1 | -0.1 | -0.1 | -0.2 | -0.2 | -0.3 | -0.3 | -0.4  |
| 53  | -0.316 | 0.0  | 0.0  | -0.1 | -0.1 | -0.2 | -0.2 | -0.3 | -0.3 | -0.4 | -0.5 | -0.6 | -0.7 | -1.0  |
| 54  | -0.063 | 0.0  | -0.1 | -0.1 | -0.1 | -0.2 | -0.2 | -0.3 | -0.4 | -0.4 | -0.5 | -0.6 | -0.7 | -0.9  |
| 55  | 0.119  | 0.0  | 0.0  | -0.1 | -0.1 | -0.1 | -0.2 | -0.3 | -0.3 | -0.4 | -0.5 | -0.6 | -0.7 | -0.9  |
| 56  | 0.049  | 0.0  | 0.0  | -0.1 | -0.1 | -0.1 | -0.2 | -0.2 | -0.3 | -0.4 | -0.5 | -0.6 | -0.7 | -1.1  |
| 57  | 0.031  | 0.0  | -0.1 | -0.1 | -0.1 | -0.3 | -0.4 | -0.5 | -0.7 | -0.9 | -1.1 | -1.4 | -1.7 | -2.2  |
| 58  | 0.121  | 0.0  | -0.1 | -0.1 | -0.1 | -0.3 | -0.4 | -0.5 | -0.7 | -0.8 | -1.1 | -1.3 | -1.6 | -2.5  |
| 59  | -0.164 | 0.0  | -0.1 | -0.1 | -0.1 | -0.2 | -0.3 | -0.3 | -0.4 | -0.5 | -0.6 | -0.7 | -0.9 | -1.1  |
| 60  | 0.102  | 0.0  | -0.1 | -0.2 | -0.2 | -0.3 | -0.4 | -0.4 | -0.5 | -0.6 | -0.7 | -0.8 | -0.9 | -1.2  |
| 61  | 0.113  | 0.0  | 0.0  | 0.0  | 0.0  | -0.1 | -0.2 | -0.2 | -0.2 | -0.3 | -0.4 | -0.5 | -0.6 | -0.8  |
| 62  | -0.278 | -0.2 | -0.9 | -1.1 | -1.2 | -2.1 | -2.8 | -3.6 | -4.4 | -5.3 | -6.5 | -7.8 | -9.6 | -14.0 |
| 63  | 0.587  | -0.2 | -0.2 | -0.3 | -0.3 | -0.3 | -0.4 | -0.5 | -0.6 | -0.9 | -1.1 | -1.4 | -1.5 | -0.9  |
| 64  | -0.454 | 0.1  | 0.2  | 0.1  | -0.1 | -0.1 | -0.4 | -0.8 | -1.1 | -1.9 | -2.5 | -3.3 | -3.8 | -3.0  |
| 65  | -0.488 | -0.1 | -0.1 | -0.4 | 0.5  | -0.7 | -0.9 | -1.2 | -1.5 | -1.8 | -2.4 | -2.9 | -3.4 | -3.0  |
| 66  | -0.277 | 0.0  | 0.0  | -0.1 | -0.1 | -0.1 | -0.2 | -0.2 | -0.4 | -0.6 | -0.8 | -1.0 | -1.2 | -1.1  |
| 67  | -0.031 | 0.0  | 0.0  | 0.0  | 0.0  | 0.1  | 0.1  | 0.1  | 0.1  | 0.0  | -0.1 | -0.2 | -0.3 | -0.2  |
| 68  | 0.131  | 0.0  | 0.0  | 0.0  | 0.1  | 0.1  | 0.1  | 0.1  | 0.1  | 0.2  | 0.1  | 0.1  | 0.1  | 0.3   |
| 69  | 0.130  | 0.0  | 0.0  | 0.1  | 0.0  | 0.1  | 0.0  | 0.0  | 0.0  | -0.1 | -0.2 | -0.3 | -0.4 | -0.4  |
| 70  | 0.007  | 0.0  | 0.0  | 0.0  | 0.0  | 0.0  | 0.0  | 0.0  | 0.0  | 0.0  | 0.0  | 0.0  | 0.0  | 0.0   |
| 71  | 0.127  | 0.0  | 0.0  | 0.0  | 0.0  | 0.0  | 0.0  | 0.0  | 0.0  | 0.0  | 0.0  | -0.1 | -0.1 | -0.1  |
| 72  | -0.270 | 0.0  | 0.1  | 0.1  | 0.1  | 0.2  | 0.2  | 0.3  | 0.4  | 0.4  | 0.4  | 0.5  | 0.5  | 0.6   |
| 73  | -0.061 | 0.0  | 0.0  | 0.0  | 0.0  | 0.1  | 0.1  | 0.1  | 0.1  | 0.2  | 0.2  | 0.2  | 0.2  | 0.2   |
| 74  | 0.122  | 0.0  | 0.0  | 0.0  | 0.0  | 0.0  | 0.1  | 0.1  | 0.1  | 0.1  | 0.1  | 0.2  | 0.2  | 0.2   |
| 75  | 0.041  | 0.0  | 0.0  | 0.0  | 0.0  | 0.0  | 0.0  | 0.0  | 0.1  | 0.1  | 0.0  | 0.0  | 0.0  | 0.0   |
| 76  | -0.001 | 0.0  | 0.0  | -0.1 | -0.1 | -0.1 | -0.2 | -0.2 | -0.2 | -0.3 | -0.3 | -0.3 | -0.4 | -0.4  |
| 77  | 0.108  | 0.0  | 0.0  | -0.1 | -0.1 | -0.2 | -0.2 | -0.2 | -0.3 | -0.3 | -0.4 | -0.4 | -0.5 | -0.5  |
| 78  | -0.174 | 0.0  | 0.0  | 0.0  | 0.0  | 0.0  | 0.0  | 0.0  | 0.0  | 0.0  | 0.0  | 0.0  | 0.0  | 0.0   |
| 79  | 0.098  | 0.0  | 0.0  | 0.0  | 0.0  | 0.0  | 0.0  | 0.0  | 0.0  | 0.0  | 0.0  | 0.0  | 0.0  | 0.0   |
| 80  | 0.112  | 0.0  | 0.0  | 0.0  | 0.0  | 0.1  | 0.1  | 0.1  | 0.1  | 0.1  | 0.1  | 0.1  | 0.2  | 0.2   |
| 81  | -0.471 | 0.0  | 0.0  | 0.0  | 0.0  | 0.0  | 0.0  | 0.0  | 0.0  | 0.1  | 0.1  | 0.2  | 0.2  | 0.2   |
| 82  | 0.306  | 0.0  | 0.0  | 0.1  | 0.1  | 0.1  | 0.1  | 0.1  | 0.1  | 0.3  | 0.3  | 0.4  | 0.4  | 0.4   |
| 83  | -0.429 | 0.0  | 0.0  | 0.0  | 0.0  | 0.0  | 0.0  | 0.1  | 0.1  | 0.2  | 0.3  | 0.4  | 0.6  | 0.8   |
| 84  | 0.402  | 0.0  | 0.0  | 0.0  | 0.0  | 0.0  | 0.0  | 0.0  | 0.0  | 0.1  | 0.2  | 0.2  | 0.3  | 0.4   |
| 85  | 0.520  | 0.1  | -0.1 | -0.1 | -0.1 | 0.0  | 0.1  | 0.2  | 0.3  | 0.6  | 0.8  | 1.0  | 1.2  | 1.3   |
| 86  | -0.459 | 0.0  | 0.1  | 0.1  | 0.1  | 0.3  | 0.3  | 0.5  | 0.6  | 0.8  | 1.1  | 1.4  | 1.8  | 2.0   |
| 87  | -0.632 | 0.1  | 0.0  | 0.0  | 0.0  | 0.1  | 0.2  | 0.3  | 0.4  | 0.5  | 0.7  | 0.8  | 1.0  | 1.2   |
| 88  | -0.367 | 0.1  | 0.3  | 0.3  | 0.4  | 0.5  | 0.6  | 0.7  | 0.9  | 1.1  | 1.2  | 1.4  | 1.6  | 1.9   |
| 89  | 0.531  | 0.0  | 0.1  | 0.1  | 0.2  | 0.4  | 0.6  | 1.0  | 1.4  | 1.9  | 2.6  | 3.3  | 4.1  | 5.1   |
| 90  | -0.518 | -0.2 | -0.2 | -0.2 | -0.1 | -0.1 | 0.1  | 0.3  | 0.5  | 0.9  | 1.4  | 1.9  | 2.4  | 3.0   |
| 91  | -0.511 | 0.0  | 0.0  | 0.1  | 0.1  | 0.1  | 0.1  | 0.2  | 0.4  | 0.4  | 0.6  | 0.8  | 1.1  | 1.6   |
| 92  | -0.505 | 0.5  | 0.8  | 1.4  | 1.7  | 2.6  | 3.5  | 4.5  | 5.4  | 7.1  | 9.0  | 11.0 | 13.2 | 15.7  |
| 93  | 0.875  | 0.2  | 0.4  | 0.6  | 0.7  | 0.9  | 1.2  | 1.4  | 1.7  | 1.9  | 2.3  | 2.6  | 3.0  | 4.0   |
| 94  | 0.867  | -0.1 | -0.2 | -0.3 | -0.4 | -0.4 | -0.5 | -0.5 | -0.7 | -0.6 | -0.7 | -0.9 | -1.1 | -2.0  |
| 95  | 0.855  | 0.1  | 0.1  | 0.2  | 0.5  | 0.5  | 0.7  | 0.8  | 1.0  | 1.1  | 1.3  | 1.4  | 1.4  | 1.4   |
| 96  | -0.631 | -0.1 | -0.2 | -0.3 | -0.3 | -0.3 | -0.4 | -0.3 | -0.3 | -0.3 | -0.2 | -0.2 | 0.0  | 0.8   |
| 97  | 0.337  | 0.0  | -0.1 | -0.1 | -0.1 | -0.1 | -0.1 | -0.1 | -0.1 | 0.0  | 0.0  | 0.0  | 0.1  | 0.5   |
| 98  | 0.390  | 0.0  | 0.0  | 0.1  | 0.1  | 0.2  | 0.2  | 0.3  | 0.4  | 0.4  | 0.5  | 0.5  | 0.5  | 1.4   |
| 99  | -0.610 | 0.2  | 0.4  | 0.4  | 0.4  | 0.5  | 0.7  | 0.7  | 0.7  | 0.8  | 0.8  | 0.8  | 0.7  | 0.6   |
| 100 | 0.325  | 0.0  | 0.0  | 0.0  | 0.0  | 0.0  | 0.0  | 0.0  | 0.0  | 0.0  | 0.0  | 0.0  | -0.1 | -0.4  |
| 101 | 0.368  | -0.1 | -0.3 | -0.3 | -0.4 | -0.7 | -1.0 | -1.5 | -1.7 | -2.3 | -2.7 | -2.9 | -3.1 | -3.3  |
| 102 | -0.621 | 0.0  | -0.1 | -0.1 | -0.1 | -0.1 | -0.1 | -0.1 | -0.1 | -0.1 | -0.1 | -0.1 | 0.0  | 0.0   |
| 103 | 0.385  | 0.0  | 0.0  | 0.1  | 0.1  | 0.2  | 0.2  | 0.3  | 0.3  | 0.3  | 0.3  | 0.3  | 0.4  | 0.5   |
| 104 | 0.357  | 0.0  | 0.0  | 0.0  | 0.0  | 0.1  | 0.2  | 0.2  | 0.2  | 0.2  | 0.2  | 0.2  | 0.2  | 0.2   |
| 105 | -0.602 | 0.0  | 0.1  | 0.1  | 0.1  | 0.1  | 0.0  | 0.0  | -0.2 | -0.2 | -0.2 | -0.3 | -0.4 | -0.6  |
| 106 | 0.384  | 0.1  | 0.1  | 0.2  | 0.2  | 0.3  | 0.3  | 0.4  | 0.4  | 0.5  | 0.5  | 0.5  | 0.5  | 0.5   |
| 107 | 0.385  | 0.1  | 0.1  | 0.1  | 0.1  | 0.2  | 0.2  | 0.3  | 0.4  | 0.4  | 0.5  | 0.6  | 0.7  | 0.5   |
| 108 | -0.608 | 0.1  | 0.1  | 0.2  | 0.2  | 0.3  | 0.3  | 0.3  | 0.3  | 0.4  | 0.4  | 0.4  | 0.4  | 0.4   |
| 109 | 0.382  | 0.0  | 0.1  | 0.1  | 0.1  | 0.1  | 0.1  | 0.2  | 0.2  | 0.3  | 0.4  | 0.5  | 0.6  | 0.6   |

|     |        |     |     |      |      |      |      |      |      |      |      |      |      |     |
|-----|--------|-----|-----|------|------|------|------|------|------|------|------|------|------|-----|
| 110 | 0.387  | 0.0 | 0.0 | -0.1 | -0.1 | -0.1 | -0.1 | -0.1 | -0.2 | -0.2 | -0.2 | -0.2 | -0.1 | 0.1 |
| 111 | -0.611 | 0.0 | 0.0 | 0.0  | 0.1  | 0.1  | 0.1  | 0.1  | 0.1  | 0.1  | 0.1  | 0.1  | 0.0  | 0.0 |
| 112 | 0.386  | 0.0 | 0.2 | 0.3  | 0.3  | 0.4  | 0.5  | 0.5  | 0.6  | 0.7  | 0.8  | 0.9  | 1.0  | 1.3 |
| 113 | 0.404  | 0.0 | 0.1 | 0.2  | 0.2  | 0.3  | 0.3  | 0.4  | 0.4  | 0.5  | 0.6  | 0.7  | 0.9  | 0.9 |

(B) CM charges for the  $Mg_cMg_nMg_p$  system.

| Index | $C_{is}$ | $(C_{cs}-C_{is})*10^{-2}$ along the reaction coordinate -----> |      |      |      |      |      |      |      |      |      |      |      |      |      |
|-------|----------|----------------------------------------------------------------|------|------|------|------|------|------|------|------|------|------|------|------|------|
| 1     | 0.332    | 0.1                                                            | 0.1  | 0.1  | 0.1  | 0.1  | 0.2  | 0.2  | 0.3  | 0.3  | 0.3  | 0.3  | 0.3  | 0.3  | 0.3  |
| 2     | -0.586   | 0.1                                                            | 0.1  | 0.2  | 0.3  | 0.3  | 0.4  | 0.4  | 0.5  | 0.7  | 0.8  | 0.8  | 0.8  | 0.9  | 0.9  |
| 3     | 0.378    | 0.1                                                            | 0.1  | 0.3  | 0.3  | 0.4  | 0.5  | 0.5  | 0.6  | 0.8  | 0.9  | 0.9  | 0.9  | 1.0  | 1.0  |
| 4     | 0.413    | 0.0                                                            | 0.0  | 0.0  | 0.0  | 0.0  | 0.0  | 0.1  | 0.1  | 0.1  | 0.2  | 0.1  | 0.2  | 0.2  | 0.3  |
| 5     | -0.590   | 0.0                                                            | 0.1  | 0.1  | 0.1  | 0.1  | 0.1  | 0.2  | 0.2  | 0.0  | 0.0  | -0.1 | 0.0  | 0.0  | 0.1  |
| 6     | 0.375    | 0.0                                                            | 0.0  | 0.0  | 0.1  | 0.1  | 0.1  | 0.1  | 0.2  | 0.1  | 0.1  | 0.1  | 0.1  | 0.2  | 0.2  |
| 7     | 0.326    | 0.0                                                            | 0.0  | -0.1 | -0.1 | -0.1 | -0.1 | -0.1 | -0.1 | -0.2 | -0.2 | -0.2 | -0.2 | -0.2 | -0.2 |
| 8     | -0.580   | 0.0                                                            | 0.0  | 0.0  | 0.0  | 0.0  | 0.0  | 0.0  | 0.0  | 0.2  | 0.2  | 0.4  | 0.3  | 0.5  | 0.5  |
| 9     | 0.379    | 0.0                                                            | 0.0  | 0.0  | 0.0  | 0.0  | 0.0  | 0.0  | 0.0  | 0.8  | 0.8  | 0.9  | 0.9  | 1.0  | 1.0  |
| 10    | 0.326    | 0.1                                                            | 0.0  | 0.0  | 0.0  | 0.1  | 0.1  | 0.1  | 0.2  | -0.2 | -0.2 | -0.2 | -0.2 | -0.3 | -0.3 |
| 11    | 0.080    | 0.0                                                            | 0.0  | 0.0  | 0.0  | -0.1 | -0.1 | -0.1 | -0.2 | -0.3 | -0.3 | -0.4 | -0.5 | -0.3 | -0.4 |
| 12    | -0.255   | 0.0                                                            | 0.0  | 0.0  | 0.0  | 0.0  | -0.1 | -0.1 | -0.1 | 0.0  | -0.1 | 0.0  | -0.1 | 0.1  | 0.2  |
| 13    | 0.082    | 0.0                                                            | 0.0  | 0.0  | 0.0  | 0.0  | -0.1 | -0.1 | -0.1 | -0.1 | -0.1 | -0.1 | -0.2 | -0.1 | 0.0  |
| 14    | 0.098    | 0.0                                                            | 0.0  | 0.0  | 0.0  | 0.0  | 0.0  | 0.0  | 0.0  | 0.2  | 0.2  | 0.3  | 0.2  | 0.7  | 0.8  |
| 15    | 0.228    | 0.0                                                            | 0.0  | 0.0  | 0.0  | 0.0  | 0.0  | 0.0  | 0.0  | 0.4  | 0.6  | 0.4  | 0.6  | 1.2  | 1.5  |
| 16    | -0.443   | -0.3                                                           | -0.3 | -0.4 | -0.5 | -0.7 | -0.8 | -0.9 | -1.1 | -1.1 | -1.2 | -1.5 | -1.6 | -1.8 | -1.7 |
| 17    | -0.458   | 0.1                                                            | 0.2  | 0.3  | 0.4  | 0.6  | 0.8  | 1.1  | 1.3  | 1.0  | 1.4  | 1.9  | 2.4  | 1.9  | 1.7  |
| 18    | 0.096    | 0.0                                                            | 0.0  | 0.0  | 0.0  | 0.0  | 0.0  | 0.0  | 0.0  | -0.1 | -0.1 | -0.1 | -0.2 | 0.0  | -0.1 |
| 19    | -0.259   | 0.0                                                            | 0.0  | 0.0  | 0.0  | 0.0  | 0.0  | 0.0  | 0.0  | 0.0  | 0.0  | 0.1  | 0.0  | 0.2  | 0.2  |
| 20    | 0.065    | 0.0                                                            | 0.0  | 0.0  | 0.0  | 0.0  | 0.0  | 0.0  | 0.0  | 0.0  | 0.0  | 0.0  | 0.0  | 0.2  | 0.1  |
| 21    | 0.090    | 0.0                                                            | 0.0  | 0.0  | 0.0  | 0.0  | 0.0  | 0.0  | 0.0  | 0.1  | 0.1  | 0.1  | 0.1  | 0.1  | 0.0  |
| 22    | 0.260    | 0.0                                                            | 0.0  | 0.0  | 0.0  | 0.0  | 0.0  | -0.1 | -0.1 | 0.0  | 0.0  | -0.1 | -0.1 | 0.0  | 0.0  |
| 23    | -0.431   | 0.2                                                            | 0.1  | 0.2  | 0.2  | 0.3  | 0.4  | 0.5  | 0.7  | 0.9  | 1.2  | 0.2  | 0.8  | -2.3 | -2.1 |
| 24    | -0.479   | -0.2                                                           | -0.2 | -0.2 | -0.3 | -0.4 | -0.5 | -0.6 | -0.7 | -0.9 | -1.0 | -0.5 | -0.8 | 0.3  | 0.3  |
| 25    | 0.319    | 0.0                                                            | 0.0  | 0.0  | 0.0  | 0.0  | 0.0  | 0.0  | 0.0  | -0.1 | -0.1 | -0.1 | -0.1 | 0.0  | -0.1 |
| 26    | -0.593   | 0.0                                                            | 0.0  | 0.0  | 0.0  | 0.0  | 0.0  | -0.1 | -0.1 | -0.2 | -0.2 | -0.2 | -0.2 | 0.0  | 0.0  |
| 27    | 0.377    | 0.0                                                            | 0.0  | 0.0  | 0.0  | 0.0  | 0.0  | 0.0  | 0.0  | -0.1 | -0.1 | -0.2 | -0.2 | 0.0  | 0.0  |
| 28    | 0.416    | 0.0                                                            | 0.0  | 0.0  | 0.0  | 0.0  | 0.0  | 0.0  | 0.0  | 0.0  | 0.0  | 0.1  | 0.1  | 0.1  | 0.1  |
| 29    | -0.590   | 0.0                                                            | 0.0  | 0.0  | 0.0  | 0.0  | 0.0  | 0.0  | 0.0  | 0.0  | 0.1  | 0.2  | 0.2  | 0.0  | 0.0  |
| 30    | 0.356    | 0.0                                                            | 0.0  | 0.0  | 0.0  | 0.0  | -0.1 | -0.1 | -0.1 | -0.2 | -0.2 | -0.2 | -0.2 | -0.3 | -0.3 |
| 31    | 0.352    | 0.1                                                            | 0.0  | 0.1  | 0.0  | 0.0  | 0.0  | 0.0  | 0.0  | 0.1  | 0.0  | 0.2  | 0.1  | 0.1  | 0.1  |
| 32    | -0.571   | 0.0                                                            | 0.0  | 0.1  | 0.1  | 0.1  | 0.1  | 0.2  | 0.2  | 0.3  | 0.4  | 0.6  | 0.6  | 0.7  | 0.8  |
| 33    | 0.326    | 0.0                                                            | 0.0  | 0.0  | 0.0  | 0.0  | 0.0  | 0.0  | 0.0  | 0.0  | 0.0  | 0.0  | 0.1  | 0.0  | 0.1  |
| 34    | 0.317    | 0.0                                                            | 0.0  | 0.0  | 0.0  | 0.0  | 0.0  | 0.0  | 0.0  | 0.1  | 0.2  | 0.2  | 0.2  | 0.1  | 0.2  |
| 35    | 0.086    | 0.0                                                            | 0.0  | 0.0  | 0.0  | -0.1 | -0.1 | -0.1 | -0.1 | -0.2 | -0.2 | -0.2 | -0.3 | -0.2 | -0.3 |
| 36    | -0.252   | 0.0                                                            | 0.0  | -0.1 | -0.1 | -0.1 | -0.1 | -0.1 | -0.1 | -0.1 | -0.1 | -0.1 | -0.2 | -0.1 | -0.1 |
| 37    | 0.111    | 0.0                                                            | 0.0  | 0.0  | 0.0  | 0.0  | 0.0  | 0.0  | 0.0  | -0.1 | -0.1 | -0.1 | -0.2 | -0.2 | -0.2 |
| 38    | 0.081    | 0.0                                                            | 0.0  | -0.1 | -0.1 | -0.1 | -0.1 | -0.1 | -0.1 | -0.1 | -0.1 | -0.1 | -0.2 | 0.0  | 0.0  |
| 39    | 0.233    | 0.0                                                            | 0.0  | 0.0  | 0.0  | 0.0  | 0.0  | 0.0  | -0.1 | -0.1 | -0.1 | -0.1 | -0.2 | -0.1 | -0.1 |
| 40    | -0.487   | 0.0                                                            | -0.1 | -0.1 | -0.1 | -0.1 | -0.1 | -0.1 | -0.2 | -0.4 | -0.4 | -0.5 | -0.7 | 0.0  | -0.1 |
| 41    | -0.459   | 0.0                                                            | 0.1  | 0.1  | 0.2  | 0.3  | 0.4  | 0.5  | 0.6  | 0.6  | 0.7  | 0.4  | 0.6  | -0.1 | 0.3  |
| 42    | 0.351    | 0.0                                                            | 0.0  | 0.0  | 0.0  | -0.1 | -0.1 | -0.1 | -0.1 | 0.1  | 0.0  | 0.1  | 0.1  | 0.0  | -0.1 |
| 43    | -0.472   | 0.0                                                            | 0.0  | 0.0  | -0.1 | -0.1 | -0.1 | -0.1 | -0.1 | 0.2  | 0.2  | 0.2  | 0.2  | 0.1  | 0.0  |
| 44    | 0.495    | 0.0                                                            | 0.0  | -0.1 | -0.1 | -0.2 | -0.3 | -0.4 | -0.4 | -0.2 | -0.2 | -0.3 | -0.4 | -0.4 | -0.6 |
| 45    | -0.480   | 0.0                                                            | 0.0  | 0.0  | 0.0  | -0.1 | -0.1 | -0.1 | -0.1 | -0.1 | -0.2 | -0.4 | -0.4 | 0.2  | 0.2  |
| 46    | -0.612   | 0.0                                                            | -0.1 | -0.1 | -0.1 | -0.2 | -0.2 | -0.3 | -0.3 | -0.7 | -0.8 | -0.8 | -0.9 | -0.7 | -0.9 |
| 47    | -0.308   | 0.0                                                            | 0.0  | 0.0  | 0.0  | -0.1 | -0.1 | -0.1 | -0.1 | -0.2 | -0.3 | -0.3 | -0.4 | -0.4 | -0.4 |
| 48    | -0.051   | 0.0                                                            | 0.0  | 0.0  | 0.0  | 0.0  | 0.0  | 0.0  | 0.0  | -0.1 | -0.1 | -0.2 | -0.2 | -0.1 | -0.1 |

|     |        |      |      |      |      |      |      |      |      |      |      |      |      |      |      |
|-----|--------|------|------|------|------|------|------|------|------|------|------|------|------|------|------|
| 49  | 0.121  | 0.0  | 0.0  | 0.0  | 0.0  | -0.1 | -0.1 | -0.1 | -0.1 | -0.1 | -0.1 | -0.1 | -0.1 | 0.0  | -0.1 |
| 50  | 0.130  | 0.0  | 0.0  | 0.0  | 0.0  | 0.0  | 0.0  | 0.0  | 0.0  | -0.1 | -0.2 | -0.2 | -0.3 | -0.1 | 0.0  |
| 51  | 0.014  | 0.0  | 0.0  | 0.0  | 0.0  | 0.0  | -0.1 | -0.1 | -0.1 | -0.2 | -0.2 | -0.4 | -0.4 | -0.7 | -0.8 |
| 52  | 0.126  | 0.0  | 0.0  | 0.0  | 0.0  | -0.1 | -0.1 | -0.1 | -0.1 | -0.1 | -0.2 | -0.2 | -0.3 | -0.5 | -0.6 |
| 53  | -0.323 | 0.0  | 0.0  | 0.0  | -0.1 | -0.1 | -0.2 | -0.2 | -0.3 | -0.2 | -0.2 | -0.2 | -0.3 | -0.3 | -0.4 |
| 54  | -0.067 | 0.0  | 0.0  | -0.1 | -0.1 | -0.2 | -0.2 | -0.3 | -0.3 | -0.3 | -0.4 | -0.5 | -0.6 | -0.6 | -0.7 |
| 55  | 0.113  | 0.0  | 0.0  | -0.1 | -0.1 | -0.1 | -0.2 | -0.2 | -0.3 | -0.3 | -0.3 | -0.4 | -0.5 | -0.5 | -0.6 |
| 56  | 0.041  | 0.0  | 0.0  | -0.1 | -0.1 | -0.2 | -0.2 | -0.3 | -0.4 | -0.4 | -0.5 | -0.6 | -0.7 | -0.7 | -0.9 |
| 57  | 0.024  | 0.0  | -0.1 | -0.1 | -0.2 | -0.3 | -0.3 | -0.5 | -0.6 | -0.8 | -1.0 | -1.3 | -1.6 | -1.9 | -2.2 |
| 58  | 0.116  | 0.0  | -0.1 | -0.1 | -0.1 | -0.2 | -0.3 | -0.4 | -0.5 | -0.6 | -0.7 | -1.0 | -1.2 | -1.3 | -1.7 |
| 59  | -0.165 | 0.0  | -0.1 | -0.1 | -0.2 | -0.2 | -0.3 | -0.4 | -0.5 | -0.5 | -0.7 | -0.9 | -1.0 | -1.1 | -1.3 |
| 60  | 0.099  | 0.0  | -0.1 | -0.1 | -0.2 | -0.2 | -0.3 | -0.4 | -0.5 | -0.5 | -0.6 | -0.8 | -0.9 | -1.0 | -1.1 |
| 61  | 0.113  | 0.0  | 0.0  | -0.1 | -0.1 | -0.1 | -0.1 | -0.2 | -0.2 | -0.3 | -0.4 | -0.4 | -0.5 | -0.6 | -0.7 |
| 62  | -0.313 | -0.3 | -0.5 | -0.7 | -1.1 | -1.4 | -1.8 | -2.3 | -2.8 | -3.2 | -3.7 | -4.3 | -5.2 | -7.9 | -9.3 |
| 63  | 0.559  | -0.1 | -0.1 | -0.1 | -0.1 | -0.1 | -0.1 | -0.1 | -0.1 | -0.5 | -0.7 | -0.9 | -1.4 | -1.5 | -1.5 |
| 64  | -0.494 | 0.1  | 0.0  | 0.0  | -0.2 | -0.3 | -0.6 | -1.0 | -1.6 | -2.3 | -3.1 | -3.1 | -4.4 | -3.3 | -3.5 |
| 65  | -0.518 | -0.1 | -0.3 | -0.4 | -0.6 | -0.7 | -0.9 | -1.2 | -1.5 | -2.1 | -2.5 | -2.6 | -3.4 | -3.5 | -4.3 |
| 66  | -0.285 | 0.0  | 0.0  | 0.1  | 0.1  | 0.1  | 0.0  | 0.0  | -0.1 | -0.1 | -0.1 | 0.1  | 0.2  | 0.2  | 0.1  |
| 67  | -0.028 | 0.0  | 0.0  | 0.0  | 0.0  | 0.1  | 0.0  | 0.0  | 0.0  | 0.0  | -0.1 | -0.3 | -0.4 | -0.6 | -0.7 |
| 68  | 0.131  | 0.0  | 0.0  | 0.1  | 0.1  | 0.1  | 0.1  | 0.1  | 0.1  | 0.2  | 0.1  | 0.0  | -0.1 | -0.1 | -0.1 |
| 69  | 0.130  | 0.0  | 0.0  | 0.0  | 0.0  | 0.0  | -0.1 | -0.1 | -0.1 | -0.3 | -0.4 | -0.5 | -0.6 | -0.7 | -0.8 |
| 70  | 0.007  | 0.0  | 0.0  | 0.0  | 0.0  | 0.0  | 0.0  | 0.0  | 0.0  | 0.0  | 0.0  | 0.0  | 0.0  | 0.0  | 0.0  |
| 71  | 0.118  | 0.0  | 0.0  | 0.0  | 0.0  | 0.0  | 0.0  | 0.0  | 0.0  | 0.0  | -0.1 | 0.0  | -0.1 | -0.1 | -0.1 |
| 72  | -0.268 | 0.0  | 0.1  | 0.1  | 0.1  | 0.2  | 0.3  | 0.3  | 0.4  | 0.3  | 0.4  | 0.4  | 0.4  | 0.4  | 0.5  |
| 73  | -0.063 | 0.0  | 0.0  | 0.0  | 0.1  | 0.1  | 0.1  | 0.1  | 0.1  | 0.2  | 0.2  | 0.2  | 0.2  | 0.1  | 0.2  |
| 74  | 0.116  | 0.0  | 0.0  | 0.0  | 0.1  | 0.1  | 0.1  | 0.1  | 0.1  | 0.2  | 0.2  | 0.3  | 0.2  | 0.3  | 0.3  |
| 75  | 0.038  | 0.0  | 0.0  | 0.0  | 0.0  | 0.0  | 0.0  | 0.0  | 0.0  | 0.1  | 0.1  | 0.0  | 0.0  | 0.1  | 0.0  |
| 76  | -0.002 | -0.1 | -0.1 | -0.1 | -0.1 | -0.2 | -0.2 | -0.3 | -0.3 | -0.3 | -0.4 | -0.3 | -0.4 | -0.3 | -0.3 |
| 77  | 0.113  | -0.1 | -0.1 | -0.1 | -0.2 | -0.2 | -0.2 | -0.3 | -0.3 | -0.3 | -0.4 | -0.5 | -0.5 | -0.6 | -0.6 |
| 78  | -0.178 | 0.0  | 0.0  | 0.0  | 0.0  | 0.0  | 0.0  | 0.0  | 0.0  | 0.1  | 0.1  | 0.1  | 0.1  | 0.2  | 0.1  |
| 79  | 0.093  | 0.0  | 0.0  | 0.0  | 0.0  | 0.0  | 0.0  | 0.0  | 0.0  | 0.1  | 0.1  | 0.1  | 0.1  | 0.1  | 0.1  |
| 80  | 0.107  | 0.1  | 0.0  | 0.1  | 0.1  | 0.1  | 0.1  | 0.1  | 0.1  | 0.2  | 0.2  | 0.3  | 0.3  | 0.3  | 0.2  |
| 81  | -0.476 | -0.1 | -0.1 | -0.1 | -0.1 | -0.2 | -0.2 | -0.2 | -0.2 | 0.0  | 0.1  | 0.5  | 0.5  | 0.8  | 0.9  |
| 82  | 0.307  | -0.1 | -0.1 | 0.0  | -0.1 | -0.1 | -0.1 | -0.1 | 0.0  | 0.2  | 0.2  | 0.6  | 0.6  | 0.8  | 0.9  |
| 83  | -0.435 | 0.0  | 0.0  | -0.1 | -0.1 | -0.1 | -0.2 | -0.2 | -0.2 | -0.2 | -0.3 | -4.2 | -3.7 | -4.0 | -3.9 |
| 84  | 0.389  | 0.1  | 0.1  | 0.1  | 0.1  | 0.1  | 0.1  | 0.1  | 0.1  | 1.1  | 0.9  | 0.1  | 0.0  | 0.2  | 0.2  |
| 85  | 0.528  | 0.0  | 0.0  | 0.0  | 0.0  | 0.0  | -0.1 | -0.1 | 0.0  | -0.5 | -0.5 | -1.7 | -1.3 | -1.6 | -1.6 |
| 86  | -0.431 | 0.2  | 0.2  | 0.2  | 0.2  | 0.4  | 0.4  | 0.5  | 0.6  | 1.5  | 1.6  | 0.9  | 1.5  | 0.5  | 0.3  |
| 87  | -0.627 | 0.1  | 0.1  | 0.2  | 0.2  | 0.2  | 0.3  | 0.3  | 0.4  | 1.4  | 1.5  | 0.7  | 0.9  | 0.8  | 0.8  |
| 88  | -0.350 | -0.1 | 0.0  | -0.1 | 0.0  | 0.0  | 0.0  | 0.1  | 0.2  | -2.4 | -2.3 | -1.3 | -1.3 | -0.9 | -0.8 |
| 89  | 0.527  | 0.0  | -0.1 | -0.1 | -0.1 | 0.0  | 0.1  | 0.3  | 0.6  | 0.7  | 1.2  | 1.7  | 2.4  | 3.0  | 3.6  |
| 90  | -0.518 | 0.1  | -0.1 | -0.2 | -0.3 | -0.2 | -0.2 | -0.1 | 0.1  | 0.7  | 1.0  | 1.4  | 1.9  | 2.1  | 2.6  |
| 91  | -0.516 | -0.1 | -0.1 | -0.1 | -0.1 | -0.2 | -0.1 | -0.1 | -0.1 | 0.0  | 0.1  | 0.4  | 0.5  | 0.9  | 1.1  |
| 92  | -0.497 | 0.5  | 0.8  | 1.2  | 1.7  | 2.2  | 2.8  | 3.6  | 4.4  | 5.2  | 6.4  | 7.2  | 9.3  | 11.4 | 13.6 |
| 93  | 0.884  | 0.1  | 0.4  | 0.6  | 0.8  | 1.1  | 1.3  | 1.5  | 1.8  | 2.0  | 2.4  | 2.3  | 2.6  | 2.8  | 2.9  |
| 94  | 0.763  | 0.0  | -0.1 | -0.2 | -0.4 | -0.5 | -0.7 | -0.9 | -1.0 | -0.9 | -1.1 | -2.1 | -1.9 | -1.2 | -1.5 |
| 95  | 0.825  | 0.1  | 0.1  | 0.2  | 0.3  | 0.4  | 0.5  | 0.6  | 0.7  | 0.7  | 0.8  | 0.7  | 0.6  | 0.7  | 0.6  |
| 96  | -0.618 | 0.0  | 0.1  | 0.1  | 0.2  | 0.2  | 0.3  | 0.4  | 0.5  | 2.9  | 2.9  | 1.3  | 1.5  | 1.1  | 1.3  |
| 97  | 0.343  | 0.1  | 0.1  | 0.1  | 0.2  | 0.2  | 0.3  | 0.3  | 0.4  | 0.1  | 0.2  | 0.3  | 0.3  | 1.0  | 1.5  |
| 98  | 0.388  | 0.1  | 0.0  | 0.1  | 0.1  | 0.1  | 0.1  | 0.2  | 0.2  | -0.2 | -0.1 | -0.2 | 0.0  | -0.7 | -0.6 |
| 99  | -0.652 | -0.1 | 0.0  | 0.0  | 0.2  | 0.2  | 0.2  | 0.3  | 0.4  | -0.1 | -0.2 | 0.9  | 0.7  | -1.8 | -2.2 |
| 100 | 0.298  | 0.0  | 0.0  | 0.0  | 0.0  | 0.0  | 0.0  | -0.1 | -0.1 | -0.4 | -0.4 | -0.6 | -0.6 | -0.9 | -0.9 |
| 101 | 0.350  | -0.1 | -0.1 | -0.1 | -0.2 | -0.2 | -0.2 | -0.3 | -0.4 | -3.8 | -3.8 | -3.3 | -3.4 | -3.0 | -3.1 |
| 102 | -0.606 | 0.0  | -0.1 | -0.1 | -0.1 | -0.2 | -0.2 | -0.2 | -0.3 | -0.4 | -0.4 | -0.3 | -0.4 | -0.4 | -0.4 |
| 103 | 0.368  | 0.1  | 0.1  | 0.2  | 0.2  | 0.2  | 0.3  | 0.3  | 0.4  | 0.5  | 0.5  | 0.6  | 0.6  | 0.5  | 0.4  |
| 104 | 0.363  | 0.0  | 0.0  | 0.0  | 0.0  | 0.0  | 0.0  | 0.0  | 0.0  | 0.2  | 0.1  | 0.2  | 0.1  | 0.0  | -0.1 |
| 105 | -0.620 | -0.5 | -0.3 | -0.4 | -0.5 | -0.7 | -0.8 | -0.9 | -0.9 | -1.1 | -0.9 | 0.9  | 0.8  | 0.7  | 0.7  |
| 106 | 0.374  | -0.5 | -0.2 | -0.3 | -0.2 | -0.2 | -0.2 | -0.2 | -0.1 | 0.6  | 0.8  | 0.7  | 0.7  | 0.8  | 1.0  |
| 107 | 0.334  | -0.6 | -0.3 | -0.5 | -0.5 | -0.5 | -0.5 | -0.6 | -0.5 | 0.0  | 0.4  | 4.7  | 4.5  | 4.8  | 4.9  |

|     |        |     |     |     |     |     |     |     |     |     |     |     |     |     |     |     |
|-----|--------|-----|-----|-----|-----|-----|-----|-----|-----|-----|-----|-----|-----|-----|-----|-----|
| 108 | -0.609 | 0.2 | 0.2 | 0.3 | 0.3 | 0.4 | 0.4 | 0.4 | 0.4 | 0.4 | 0.4 | 0.5 | 0.7 | 0.8 | 0.5 | 0.2 |
| 109 | 0.382  | 0.1 | 0.1 | 0.2 | 0.1 | 0.2 | 0.2 | 0.2 | 0.3 | 0.4 | 0.4 | 0.4 | 0.4 | 0.4 | 0.6 | 0.8 |
| 110 | 0.383  | 0.1 | 0.1 | 0.1 | 0.1 | 0.2 | 0.2 | 0.2 | 0.2 | 0.4 | 0.3 | 0.6 | 0.6 | 0.7 | 1.0 |     |
| 111 | -0.617 | 0.0 | 0.0 | 0.0 | 0.1 | 0.1 | 0.1 | 0.2 | 0.2 | 0.2 | 0.2 | 0.7 | 0.5 | 0.6 | 0.6 |     |
| 112 | 0.381  | 0.4 | 0.2 | 0.3 | 0.4 | 0.6 | 0.7 | 0.9 | 0.9 | 0.8 | 0.7 | 1.3 | 1.4 | 1.5 | 1.6 |     |
| 113 | 0.395  | 0.1 | 0.1 | 0.2 | 0.2 | 0.2 | 0.3 | 0.3 | 0.4 | 0.7 | 0.8 | 1.1 | 1.1 | 1.4 | 1.5 |     |

(C) CM charges for the Mg<sub>c</sub>Mg<sub>n</sub> system.

Index C<sub>is</sub> | (C<sub>cs</sub>-C<sub>is</sub>)\*10<sup>-2</sup> along the reaction coordinate ----->|

|    |        |      |      |      |      |      |      |      |      |      |      |      |      |      |      |      |      |      |      |      |
|----|--------|------|------|------|------|------|------|------|------|------|------|------|------|------|------|------|------|------|------|------|
| 1  | 0.330  | 0.0  | 0.0  | -0.1 | -0.1 | -0.1 | 0.0  | 0.0  | 0.0  | 0.0  | 0.0  | 0.1  | 0.1  | 0.1  | 0.1  | 0.1  | 0.1  | 0.1  | 0.3  |      |
| 2  | -0.591 | 0.0  | 0.0  | -0.1 | -0.1 | -0.1 | -0.1 | -0.1 | 0.0  | 0.0  | 0.0  | 0.0  | 0.0  | -0.1 | 0.0  | 0.0  | -0.2 | 0.0  | 0.2  |      |
| 3  | 0.371  | 0.0  | 0.0  | -0.1 | -0.1 | -0.1 | -0.1 | -0.1 | 0.0  | 0.0  | 0.0  | 0.0  | -0.1 | -0.2 | -0.2 | -0.1 | -0.4 | -0.3 | 0.0  |      |
| 4  | 0.415  | 0.0  | 0.0  | -0.1 | -0.1 | -0.1 | -0.1 | -0.1 | 0.0  | 0.0  | 0.0  | 0.0  | 0.1  | 0.0  | 0.1  | 0.1  | 0.2  | 0.4  | 0.2  |      |
| 5  | -0.583 | 0.1  | 0.1  | -0.1 | 0.0  | 0.1  | 0.1  | 0.1  | 0.1  | 0.2  | 0.2  | 0.2  | 0.4  | 0.8  | 0.8  | 0.9  | 0.9  | 1.2  | 0.9  |      |
| 6  | 0.376  | 0.0  | 0.0  | 0.0  | 0.0  | 0.0  | 0.0  | 0.0  | 0.0  | 0.0  | 0.0  | 0.1  | 0.1  | -0.1 | 0.0  | 0.0  | -0.1 | 0.4  | 0.1  |      |
| 7  | 0.326  | 0.0  | 0.0  | 0.1  | 0.0  | 0.1  | 0.0  | 0.1  | 0.0  | 0.1  | 0.1  | 0.1  | 0.1  | 0.0  | -0.2 | -0.2 | -0.2 | -0.1 | -0.2 | -0.1 |
| 8  | -0.568 | 0.0  | 0.0  | -0.2 | -0.2 | -0.1 | -0.2 | -0.1 | 0.0  | 0.1  | 0.2  | 0.3  | 0.4  | 0.2  | 0.3  | 0.3  | 0.4  | 0.3  | 0.3  |      |
| 9  | 0.391  | 0.0  | 0.0  | -0.1 | -0.1 | -0.1 | -0.1 | -0.1 | 0.0  | 0.0  | 0.1  | 0.1  | 0.1  | 0.1  | 0.0  | 0.0  | 0.1  | 0.1  | 0.1  |      |
| 10 | 0.343  | 0.2  | 0.2  | -0.6 | -0.4 | -0.3 | -0.4 | -0.3 | -0.2 | -0.1 | 0.1  | 0.2  | 0.3  | 1.9  | 2.0  | 2.3  | 3.2  | 3.0  | 2.5  |      |
| 11 | 0.090  | 0.0  | 0.0  | 0.1  | 0.0  | 0.0  | 0.0  | 0.0  | 0.0  | 0.0  | 0.0  | 0.0  | 0.0  | -0.2 | -0.2 | -0.3 | -0.2 | -0.3 | -0.4 |      |
| 12 | -0.244 | -0.1 | -0.1 | -0.1 | -0.1 | -0.1 | -0.2 | -0.2 | -0.2 | -0.2 | -0.2 | -0.2 | -0.2 | -0.4 | -0.4 | -0.4 | -0.4 | -0.4 | -0.5 |      |
| 13 | 0.099  | 0.0  | 0.0  | 0.0  | 0.0  | -0.1 | -0.1 | -0.1 | -0.1 | -0.1 | -0.1 | -0.1 | -0.1 | -0.1 | -0.1 | -0.1 | -0.4 | -0.5 | -0.1 |      |
| 14 | 0.108  | -0.2 | -0.2 | -0.2 | -0.2 | -0.2 | -0.2 | -0.2 | -0.2 | -0.2 | -0.2 | -0.2 | -0.1 | -0.4 | -0.4 | -0.4 | -0.5 | -0.8 | -0.5 |      |
| 15 | 0.278  | 0.0  | 0.0  | -0.1 | -0.2 | -0.2 | -0.2 | -0.2 | -0.2 | -0.2 | -0.3 | -0.3 | -0.3 | -0.2 | -0.2 | -0.2 | -0.1 | 0.1  | -0.1 |      |
| 16 | -0.427 | 0.0  | 0.1  | 0.6  | 0.5  | 0.4  | 0.4  | 0.3  | 0.3  | 0.1  | -0.1 | -0.2 | -0.4 | -0.4 | -0.7 | -1.0 | -1.0 | -1.3 | -2.0 |      |
| 17 | -0.416 | 0.1  | 0.2  | 0.5  | 0.4  | 0.4  | 0.5  | 0.3  | 0.5  | 0.6  | 0.7  | 0.7  | 0.8  | 0.5  | 0.7  | 0.9  | 0.9  | 1.5  | 1.7  |      |
| 18 | 0.102  | 0.0  | 0.0  | 0.0  | 0.0  | 0.0  | 0.0  | -0.1 | 0.0  | 0.0  | 0.0  | 0.0  | 0.0  | -0.1 | -0.1 | -0.1 | -0.2 | -0.2 | -0.1 |      |
| 19 | -0.244 | 0.0  | 0.0  | 0.0  | 0.0  | 0.0  | -0.1 | -0.1 | -0.1 | -0.1 | -0.1 | -0.1 | -0.1 | -0.2 | -0.2 | -0.2 | -0.2 | -0.4 | -0.2 |      |
| 20 | 0.092  | 0.0  | 0.0  | 0.0  | 0.0  | 0.0  | 0.0  | -0.1 | -0.1 | -0.1 | -0.1 | -0.1 | -0.2 | -0.2 | -0.2 | -0.2 | -0.3 | -0.5 | -0.4 |      |
| 21 | 0.101  | 0.0  | 0.0  | 0.0  | 0.0  | 0.0  | 0.0  | 0.0  | 0.0  | 0.0  | 0.0  | -0.1 | -0.1 | -0.1 | -0.1 | -0.1 | -0.3 | -0.5 | -0.1 |      |
| 22 | 0.293  | 0.0  | 0.0  | 0.1  | 0.1  | 0.0  | 0.0  | 0.0  | 0.0  | 0.0  | 0.0  | -0.1 | -0.1 | -0.1 | -0.1 | -0.1 | -0.1 | -0.1 | -0.3 |      |
| 23 | -0.410 | -0.2 | -0.3 | -0.3 | -0.3 | -0.2 | -0.2 | -0.1 | -0.1 | -0.1 | 0.0  | 0.1  | 0.2  | 0.3  | 0.6  | 0.8  | 0.7  | 1.3  | 2.0  |      |
| 24 | -0.427 | 0.1  | 0.1  | 0.1  | 0.0  | 0.0  | -0.1 | 0.0  | -0.1 | -0.1 | -0.2 | -0.3 | -0.4 | -0.4 | -0.7 | -0.9 | -0.6 | -1.1 | -1.9 |      |
| 25 | 0.325  | 0.0  | 0.0  | 0.0  | 0.0  | 0.0  | 0.0  | 0.0  | 0.0  | 0.0  | 0.0  | 0.0  | 0.0  | 0.0  | 0.0  | -0.1 | -0.1 | -0.7 | -0.1 |      |
| 26 | -0.584 | 0.0  | 0.0  | 0.0  | 0.0  | 0.0  | 0.0  | 0.0  | 0.0  | 0.0  | 0.0  | -0.1 | -0.1 | -0.1 | -0.1 | -0.2 | -0.2 | -0.2 | -0.2 |      |
| 27 | 0.381  | 0.0  | 0.0  | 0.0  | 0.0  | 0.0  | 0.0  | 0.0  | 0.0  | 0.0  | 0.0  | -0.1 | 0.0  | 0.0  | 0.0  | 0.0  | -0.1 | 1.0  | 0.2  |      |
| 28 | 0.418  | 0.0  | 0.0  | 0.0  | 0.0  | 0.0  | 0.0  | 0.0  | 0.0  | 0.0  | 0.0  | 0.0  | 0.0  | 0.0  | 0.0  | 0.0  | -0.1 | -0.5 | -0.1 |      |
| 29 | -0.587 | 0.0  | 0.0  | 0.0  | 0.0  | 0.0  | 0.0  | 0.1  | 0.0  | 0.0  | 0.0  | 0.1  | 0.0  | 0.0  | 0.0  | 0.0  | 0.0  | 1.2  | -0.1 |      |
| 30 | 0.363  | 0.0  | 0.0  | 0.0  | 0.0  | 0.0  | 0.0  | 0.0  | 0.0  | 0.0  | 0.0  | 0.0  | 0.0  | -0.1 | -0.1 | -0.1 | 0.0  | -1.1 | -0.2 |      |
| 31 | 0.360  | 0.0  | -0.1 | 0.0  | 0.0  | 0.0  | 0.0  | 0.0  | 0.1  | 0.0  | 0.1  | 0.1  | 0.1  | 0.1  | 0.1  | 0.0  | -0.1 | -1.3 | -0.1 |      |
| 32 | -0.576 | 0.0  | 0.0  | 0.0  | 0.0  | 0.0  | 0.0  | 0.0  | 0.0  | 0.1  | 0.1  | 0.1  | 0.2  | 0.2  | 0.3  | 0.3  | 0.5  | 0.6  | 0.4  |      |
| 33 | 0.327  | 0.0  | 0.0  | 0.0  | 0.0  | 0.0  | 0.0  | 0.0  | 0.0  | 0.0  | 0.0  | 0.0  | 0.0  | 0.0  | 0.0  | -0.1 | 0.0  | -0.1 | 0.0  |      |
| 34 | 0.316  | 0.0  | 0.0  | 0.0  | 0.0  | 0.0  | 0.0  | 0.0  | 0.0  | 0.0  | 0.0  | 0.0  | 0.0  | 0.0  | 0.0  | 0.0  | -0.1 | 0.1  | 0.0  |      |
| 35 | 0.096  | 0.0  | 0.0  | 0.0  | 0.0  | 0.0  | 0.0  | 0.0  | 0.0  | 0.0  | 0.0  | -0.1 | -0.1 | -0.2 | -0.2 | -0.2 | -0.1 | -0.2 | -0.4 |      |
| 36 | -0.243 | 0.0  | 0.0  | 0.0  | 0.0  | 0.0  | 0.0  | 0.0  | 0.0  | 0.0  | 0.0  | 0.0  | 0.0  | 0.0  | 0.0  | -0.1 | 0.1  | -0.2 | -0.1 |      |
| 37 | 0.108  | 0.0  | 0.0  | 0.1  | 0.1  | 0.1  | 0.1  | 0.1  | 0.0  | 0.0  | 0.0  | 0.0  | 0.0  | -0.1 | -0.1 | -0.1 | 0.0  | -0.3 | -0.2 |      |
| 38 | 0.093  | 0.0  | 0.0  | 0.1  | 0.0  | 0.1  | 0.0  | 0.1  | 0.1  | 0.2  | 0.2  | 0.2  | 0.2  | 0.1  | 0.1  | 0.1  | 0.2  | -0.3 | 0.0  |      |
| 39 | 0.266  | 0.0  | 0.0  | 0.0  | 0.0  | 0.0  | 0.0  | 0.0  | 0.0  | 0.0  | 0.0  | 0.0  | 0.0  | -0.1 | -0.1 | -0.1 | -0.1 | -0.3 | -0.3 |      |
| 40 | -0.440 | 0.0  | 0.1  | -0.1 | -0.1 | -0.1 | -0.1 | -0.1 | 0.0  | 0.0  | 0.1  | 0.0  | -0.1 | 0.0  | 0.0  | 0.0  | -0.2 | -0.2 |      |      |
| 41 | -0.433 | 0.0  | 0.0  | 0.1  | 0.2  | 0.2  | 0.2  | 0.3  | 0.3  | 0.3  | 0.3  | 0.3  | 0.4  | 0.4  | 0.5  | 0.6  | 0.3  | 1.1  | 1.0  |      |
| 42 | 0.360  | 0.0  | 0.0  | 0.0  | 0.0  | 0.0  | 0.0  | -0.1 | 0.0  | 0.0  | 0.0  | -0.1 | -0.2 | -0.2 | -0.3 | -0.3 | -0.3 | 0.0  |      |      |
| 43 | -0.466 | 0.0  | -0.1 | -0.1 | -0.1 | -0.1 | -0.1 | -0.2 | -0.2 | -0.2 | -0.1 | -0.1 | -0.2 | 0.0  | 0.0  | -0.1 | 0.0  | 0.5  | 0.6  |      |
| 44 | 0.530  | 0.0  | 0.0  | -0.1 | -0.1 | -0.2 | -0.2 | -0.6 | -0.3 | -0.3 | -0.4 | -0.5 | -0.7 | -1.0 | -1.2 | -1.4 | -1.5 | -1.0 | -2.3 |      |
| 45 | -0.432 | 0.0  | 0.0  | 0.0  | 0.0  | 0.0  | 0.0  | 0.0  | -0.1 | 0.0  | 0.0  | -0.1 | 0.0  | 0.0  | -0.1 | -0.1 | -0.2 | 0.0  | -0.1 |      |
| 46 | -0.566 | 0.0  | 0.0  | -0.1 | -0.2 | -0.2 | -0.3 | -0.4 | -0.4 | -0.5 | -0.8 | -0.9 | -0.8 | -0.2 | -0.5 | -1.0 | -1.2 | -1.3 | -4.8 |      |
| 47 | -0.302 | 0.0  | 0.0  | 0.0  | 0.0  | 0.0  | 0.0  | 0.0  | -0.1 | -0.1 | -0.1 | -0.1 | -0.2 | -0.4 | -0.4 | -0.5 | -0.5 | -0.3 | 0.0  |      |
| 48 | -0.052 | 0.0  | 0.0  | 0.0  | 0.0  | 0.0  | 0.0  | 0.0  | -0.1 | -0.1 | -0.1 | -0.1 | -0.2 | -0.2 | -0.2 | -0.3 | 0.0  | -0.1 | -0.6 |      |
| 49 | 0.111  | 0.0  | 0.0  | 0.0  | 0.0  | -0.1 | 0.0  | -0.1 | -0.1 | -0.1 | -0.1 | -0.1 | -0.1 | 0.0  | 0.0  | 0.0  | -0.1 | 0.1  | 0.1  |      |
| 50 | 0.126  | 0.0  | 0.0  | 0.0  | 0.0  | 0.0  | 0.0  | 0.1  | 0.1  | 0.1  | 0.1  | 0.1  | 0.1  | 0.2  | 0.2  | 0.2  | 0.1  | 0.3  | 0.3  |      |
| 51 | 0.016  | 0.0  | 0.0  | -0.1 | -0.1 | -0.1 | -0.1 | -0.2 | -0.2 | -0.3 | -0.3 | -0.4 | -0.5 | -0.6 | -0.6 | -0.7 | -0.8 | -0.9 | -1.3 |      |
| 52 | 0.127  | 0.0  | -0.1 | 0.0  | -0.1 | -0.1 | -0.1 | -0.1 | -0.2 | -0.2 | -0.3 | -0.3 | -0.4 | -0.4 | -0.5 | -0.5 | -0.7 | -1.1 | -0.7 |      |
| 53 | -0.311 | 0.0  | 0.0  | -0.1 | -0.1 | -0.2 | -0.2 | -0.3 | -0.4 | -0.5 | -0.6 | -0.8 | -0.9 | -1.0 | -1.2 | -1.3 | -1.3 | -1.4 | -2.1 |      |
| 54 | -0.061 | 0.0  | -0.1 | -0.1 | -0.1 | -0.1 | -0.1 | -0.2 | -0.2 | -0.2 | -0.3 | -0.3 | -0.4 | -0.5 | -0.6 | -0.7 | -0.7 | -1.0 | -1.1 |      |
| 55 | 0.119  | 0.0  | 0.0  | 0.0  | -0.1 | -0.1 | -0.1 | -0.1 | -0.1 | -0.1 | -0.2 | -0.2 | -0.3 | -0.3 | -0.4 | -0.4 | -0.7 | -0.7 | -0.7 |      |
| 56 | 0.053  | 0.0  | -0.1 | -0.1 | -0.1 | -0.1 | -0.1 | -0.2 | -0.2 | -0.2 | -0.3 | -0.3 | -0.4 | -0.6 | -0.7 | -0.8 | -0.9 | -1.2 | -1.3 |      |

|     |        |      |      |      |      |      |      |      |      |      |      |      |      |      |      |      |      |      |       |
|-----|--------|------|------|------|------|------|------|------|------|------|------|------|------|------|------|------|------|------|-------|
| 57  | 0.028  | 0.0  | 0.0  | 0.0  | 0.0  | 0.0  | -0.1 | -0.1 | -0.1 | -0.1 | -0.2 | -0.2 | -0.3 | -0.3 | -0.4 | -0.6 | -1.0 | -1.4 | -1.8  |
| 58  | 0.117  | 0.0  | 0.0  | -0.1 | -0.1 | -0.2 | -0.2 | -0.2 | -0.3 | -0.3 | -0.4 | -0.5 | -0.6 | -0.8 | -1.0 | -1.2 | -1.3 | -1.9 | -2.5  |
| 59  | -0.163 | 0.0  | -0.1 | 0.0  | -0.1 | -0.1 | -0.1 | -0.1 | -0.2 | -0.2 | -0.2 | -0.3 | -0.4 | -0.4 | -0.5 | -0.6 | -0.7 | -1.5 | -1.1  |
| 60  | 0.104  | -0.1 | -0.1 | -0.1 | -0.2 | -0.2 | -0.2 | -0.2 | -0.3 | -0.3 | -0.4 | -0.4 | -0.6 | -0.5 | -0.6 | -0.7 | -0.8 | -1.0 | -1.2  |
| 61  | 0.112  | 0.0  | 0.0  | 0.0  | 0.0  | 0.0  | 0.0  | 0.0  | 0.0  | 0.0  | 0.0  | -0.1 | -0.1 | -0.1 | -0.1 | -0.2 | -0.4 | -0.4 | -0.5  |
| 62  | -0.276 | -0.2 | -0.6 | -0.7 | -0.9 | -1.2 | -1.1 | -1.5 | -1.8 | -2.2 | -2.7 | -3.2 | -3.6 | -4.5 | -5.3 | -6.4 | -6.5 | -8.5 | -12.9 |
| 63  | 0.561  | -0.2 | -0.5 | -0.9 | -1.0 | -1.0 | -1.1 | -0.8 | -0.7 | -0.6 | -0.5 | -0.3 | 0.2  | 0.3  | 0.3  | 0.3  | 0.3  | -0.1 | 1.1   |
| 64  | -0.478 | 0.5  | 0.8  | 1.1  | 1.1  | 1.2  | 1.1  | 1.1  | 1.0  | 1.0  | 0.8  | 0.6  | 0.3  | 0.1  | -0.3 | -0.8 | 0.2  | -1.9 | -1.1  |
| 65  | -0.464 | 0.1  | 0.3  | 0.5  | 0.4  | 0.4  | 0.5  | -0.1 | 0.5  | 0.5  | 0.4  | 0.3  | 0.3  | -0.2 | -0.3 | -0.4 | -0.7 | -1.9 | -1.6  |
| 66  | -0.288 | 0.0  | 0.0  | -0.4 | -0.4 | -0.4 | -0.4 | -0.4 | -0.3 | -0.3 | -0.3 | -0.3 | -0.4 | -0.2 | -0.4 | -0.5 | -1.0 | -1.0 | -0.5  |
| 67  | -0.036 | 0.0  | 0.0  | 0.2  | 0.2  | 0.3  | 0.3  | 0.3  | 0.3  | 0.4  | 0.4  | 0.4  | 0.4  | 0.5  | 0.5  | 0.4  | 0.3  | 0.8  | 0.4   |
| 68  | 0.128  | 0.0  | 0.1  | 0.0  | 0.0  | 0.1  | 0.1  | 0.0  | 0.1  | 0.1  | 0.1  | 0.1  | 0.1  | 0.1  | 0.1  | 0.1  | 0.1  | 0.1  | 0.4   |
| 69  | 0.127  | 0.0  | 0.0  | 0.2  | 0.2  | 0.2  | 0.2  | 0.2  | 0.3  | 0.3  | 0.3  | 0.2  | 0.2  | 0.3  | 0.3  | 0.2  | 0.1  | 0.1  | -0.1  |
| 70  | 0.006  | 0.0  | 0.0  | 0.0  | 0.0  | 0.0  | 0.0  | 0.0  | 0.0  | 0.0  | 0.0  | 0.0  | 0.0  | 0.0  | 0.0  | 0.0  | 0.0  | 0.2  | 0.1   |
| 71  | 0.122  | 0.0  | 0.0  | 0.0  | 0.0  | 0.0  | 0.0  | 0.0  | 0.0  | 0.0  | 0.0  | 0.0  | 0.0  | 0.0  | 0.0  | -0.1 | -0.1 | -0.1 | 0.0   |
| 72  | -0.272 | 0.0  | 0.1  | 0.1  | 0.1  | 0.2  | 0.1  | 0.2  | 0.3  | 0.3  | 0.4  | 0.4  | 0.5  | 0.4  | 0.5  | 0.5  | 0.6  | 1.6  | 0.6   |
| 73  | -0.061 | 0.0  | 0.0  | 0.0  | 0.0  | 0.0  | 0.0  | 0.0  | 0.0  | 0.0  | 0.0  | 0.0  | 0.1  | 0.0  | 0.0  | 0.0  | 0.0  | 0.2  | 0.1   |
| 74  | 0.118  | 0.0  | 0.0  | 0.1  | 0.0  | 0.0  | 0.1  | 0.0  | 0.1  | 0.1  | 0.1  | 0.1  | 0.1  | 0.0  | 0.0  | 0.0  | 0.0  | 0.1  | 0.1   |
| 75  | 0.042  | 0.0  | 0.0  | -0.1 | -0.1 | -0.1 | -0.1 | -0.1 | -0.1 | -0.1 | -0.1 | -0.1 | -0.1 | -0.3 | -0.3 | -0.2 | -0.2 | -0.3 | -0.5  |
| 76  | -0.001 | 0.0  | -0.1 | 0.0  | 0.0  | 0.0  | 0.0  | 0.0  | -0.1 | -0.1 | -0.1 | -0.1 | -0.2 | -0.2 | -0.3 | -0.3 | -0.3 | -0.2 | -0.5  |
| 77  | 0.111  | -0.1 | -0.2 | -0.1 | -0.2 | -0.2 | -0.2 | -0.2 | -0.2 | -0.2 | -0.2 | -0.3 | -0.2 | -0.4 | -0.4 | -0.5 | -0.5 | -0.3 | -0.5  |
| 78  | -0.174 | 0.0  | 0.0  | 0.0  | 0.0  | 0.0  | 0.0  | -0.1 | -0.1 | -0.1 | -0.1 | -0.1 | -0.1 | -0.2 | -0.2 | -0.2 | -0.2 | -0.2 | -0.2  |
| 79  | 0.100  | 0.0  | 0.0  | 0.0  | 0.0  | 0.0  | 0.0  | 0.0  | -0.1 | 0.0  | 0.0  | -0.1 | -0.1 | -0.1 | -0.3 | -0.2 | -0.2 | -0.2 | -0.3  |
| 80  | 0.111  | 0.0  | 0.0  | -0.1 | -0.1 | -0.1 | -0.1 | -0.1 | 0.0  | -0.1 | 0.0  | 0.0  | 0.0  | 0.0  | 0.0  | 0.0  | -0.1 | 0.2  | 0.1   |
| 81  | -0.477 | 0.0  | -0.1 | 0.3  | 0.3  | 0.2  | 0.2  | 0.2  | 0.2  | 0.1  | 0.1  | 0.0  | 0.1  | -0.3 | -0.3 | -0.3 | -0.2 | 0.1  | -0.2  |
| 82  | 0.304  | 0.0  | 0.0  | 0.1  | 0.1  | 0.1  | 0.1  | 0.0  | 0.0  | -0.1 | 0.0  | -0.1 | -0.1 | -0.2 | -0.2 | -0.1 | 0.1  | -0.1 | 0.1   |
| 83  | -0.501 | 0.1  | 0.4  | -0.1 | -0.2 | -0.2 | -0.2 | -0.4 | -0.3 | -0.4 | -0.4 | -0.4 | -0.4 | -0.8 | -0.7 | -0.6 | -0.5 | -0.3 | 0.1   |
| 84  | 0.344  | 0.2  | 0.7  | -0.5 | -0.6 | -0.7 | -0.6 | -1.0 | -0.8 | -0.8 | -0.9 | -0.9 | -1.0 | -1.4 | -1.4 | -1.4 | -1.3 | -0.9 | -1.0  |
| 85  | 0.494  | -0.2 | 0.1  | 0.7  | 0.8  | 0.8  | 0.8  | 0.7  | 0.7  | 0.7  | 0.6  | 0.6  | 0.6  | 0.5  | 0.6  | 0.8  | 1.0  | 1.2  | 1.7   |
| 86  | -0.451 | -0.2 | -0.4 | -1.5 | -1.2 | -1.3 | -1.2 | -1.1 | -1.2 | -1.2 | -1.1 | -1.0 | -0.9 | -0.9 | -0.6 | -0.4 | -0.2 | -0.3 | 0.5   |
| 87  | -0.622 | -0.2 | -0.3 | -0.9 | -0.9 | -0.9 | -0.9 | -1.1 | -0.9 | -0.9 | -0.9 | -0.8 | -0.8 | -1.3 | -1.2 | -1.0 | -0.7 | -0.8 | -0.3  |
| 88  | -0.378 | -0.1 | -0.1 | 0.3  | 0.3  | 0.4  | 0.4  | 0.3  | 0.3  | 0.4  | 0.4  | 0.4  | 0.4  | 0.4  | 0.5  | 0.7  | 1.0  | 1.4  | 1.5   |
| 89  | 0.494  | -0.2 | -0.2 | -0.3 | -0.3 | -0.3 | -0.3 | -0.5 | -0.2 | 0.0  | 0.1  | 0.4  | 0.7  | -0.2 | 0.5  | 1.5  | 2.5  | 4.2  | 5.9   |
| 90  | -0.509 | -0.4 | -0.9 | -1.9 | -2.2 | -2.3 | -2.3 | -2.5 | -2.4 | -2.5 | -2.4 | -2.4 | -2.9 | -2.6 | -2.2 | -2.1 | -2.0 | -0.7 | -0.7  |
| 91  | -0.505 | -0.1 | -0.3 | -0.2 | -0.4 | -0.5 | -0.5 | -0.7 | -0.7 | -0.7 | -0.8 | -0.8 | -0.9 | -1.3 | -1.2 | -1.0 | -0.8 | -0.7 | 0.4   |
| 92  | -0.500 | 0.4  | 0.7  | 0.7  | 1.2  | 1.8  | 1.9  | 2.3  | 3.0  | 3.6  | 4.1  | 4.7  | 5.5  | 4.9  | 6.0  | 7.4  | 9.0  | 12.2 | 14.7  |
| 93  | 0.870  | -0.1 | -0.1 | -0.1 | -0.2 | -0.2 | -0.2 | -0.3 | -0.3 | -0.4 | -0.5 | -0.6 | -0.8 | -0.8 | -1.0 | -1.1 | -3.5 | -1.7 | -2.8  |
| 94  | 0.856  | -0.3 | -0.5 | -1.1 | -1.1 | -1.0 | -0.9 | -0.9 | -0.8 | -0.6 | -0.4 | -0.3 | 0.0  | 0.1  | 0.2  | 0.4  | 0.3  | 0.7  | 0.7   |
| 95  | -0.630 | -0.2 | -0.2 | -0.5 | -0.5 | -0.5 | -0.4 | -0.4 | -0.4 | -0.5 | -0.5 | -0.5 | -0.5 | -0.2 | -0.2 | -0.1 | 0.9  | -1.0 | 0.4   |
| 96  | 0.320  | 0.0  | 0.0  | 0.0  | 0.0  | 0.0  | -0.1 | 0.0  | 0.0  | -0.1 | -0.1 | -0.1 | -0.1 | -0.3 | -0.3 | -0.4 | -1.2 | -0.4 | -0.5  |
| 97  | 0.317  | 0.0  | 0.0  | -0.1 | -0.2 | -0.2 | -0.2 | -0.1 | -0.2 | -0.2 | -0.3 | -0.3 | -0.2 | -0.4 | -0.4 | -0.4 | -1.0 | -0.6 | -0.6  |
| 98  | -0.618 | -0.1 | -0.1 | -0.1 | -0.1 | -0.1 | -0.1 | -0.2 | -0.1 | -0.1 | -0.1 | -0.1 | -0.1 | -0.2 | -0.2 | -0.2 | -0.2 | -0.2 | -0.1  |
| 99  | 0.378  | 0.0  | 0.1  | 0.3  | 0.3  | 0.3  | 0.3  | 0.2  | 0.4  | 0.4  | 0.4  | 0.4  | 0.5  | 0.2  | 0.3  | 0.3  | 0.2  | 0.4  | 0.4   |
| 100 | 0.349  | 0.1  | 0.2  | 0.6  | 0.7  | 0.7  | 0.7  | 0.6  | 0.7  | 0.7  | 0.7  | 0.7  | 0.7  | 0.7  | 0.8  | 0.8  | 0.8  | 0.9  | 0.9   |
| 101 | -0.726 | -0.1 | -0.2 | -0.5 | -0.5 | -0.5 | -0.4 | -0.8 | -0.4 | -0.4 | -0.4 | -0.4 | -0.5 | -1.6 | -1.5 | -1.4 | -1.4 | -2.1 | -2.6  |
| 102 | 0.292  | -0.1 | -0.1 | -0.4 | -0.4 | -0.4 | -0.4 | -0.3 | -0.3 | -0.3 | -0.3 | -0.3 | -0.1 | 0.1  | 0.1  | 0.1  | 0.2  | 0.3  | -0.5  |
| 103 | 0.276  | 0.0  | -0.1 | -0.1 | -0.1 | -0.1 | -0.1 | -0.3 | 0.0  | 0.0  | 0.0  | 0.0  | 0.0  | 0.2  | 0.4  | 0.6  | 0.8  | 1.0  | 1.1   |
| 104 | -0.664 | 0.0  | 0.1  | 0.6  | 0.6  | 0.6  | 0.6  | 0.9  | 0.7  | 0.7  | 0.8  | 0.8  | 1.0  | 0.5  | 0.4  | 0.4  | 0.3  | 0.8  | 0.2   |
| 105 | 0.299  | 0.0  | 0.1  | 0.8  | 0.9  | 0.9  | 0.9  | 1.2  | 1.0  | 1.1  | 1.1  | 1.2  | 1.5  | 0.8  | 0.8  | 0.7  | 0.7  | 0.8  | 0.6   |
| 106 | 0.314  | 0.1  | 0.3  | 0.5  | 0.5  | 0.5  | 0.5  | 0.6  | 0.6  | 0.7  | 0.7  | 0.8  | 0.7  | 0.8  | 0.8  | 0.8  | 0.8  | 0.8  | 0.8   |
| 107 | -0.678 | 0.7  | 0.7  | 2.9  | 3.2  | 3.2  | 3.2  | 4.9  | 3.3  | 3.3  | 3.4  | 3.5  | 3.9  | 7.9  | 7.8  | 7.7  | 7.4  | 8.3  | 7.4   |
| 108 | 0.309  | 0.2  | 0.4  | 1.2  | 1.4  | 1.4  | 1.4  | 3.0  | 1.3  | 1.3  | 1.4  | 1.5  | 2.0  | 5.6  | 5.6  | 5.6  | 5.7  | 5.6  | 5.9   |
| 109 | 0.298  | 0.4  | 0.6  | 1.0  | 1.1  | 1.1  | 1.1  | 1.3  | 1.2  | 1.2  | 1.3  | 1.4  | 1.4  | 1.8  | 1.7  | 1.6  | 1.7  | 1.3  | 1.5   |
| 110 | -0.715 | 0.0  | 0.0  | -0.1 | -0.1 | -0.1 | 0.0  | 0.1  | -0.1 | 0.0  | 0.1  | 0.1  | 0.2  | 0.0  | -0.1 | -0.1 | 0.1  | 1.0  | -0.3  |
| 111 | 0.343  | -0.1 | -0.1 | -0.2 | -0.2 | -0.2 | -0.2 | -0.3 | -0.2 | -0.3 | -0.4 | -0.4 | -0.5 | -0.4 | -0.4 | -0.5 | -0.6 | -1.3 | -0.2  |
| 112 | 0.297  | 0.0  | 0.0  | 0.0  | 0.0  | 0.0  | 0.0  | -0.1 | 0.0  | -0.1 | -0.1 | -0.1 | -0.1 | 0.0  | 0.0  | -0.1 | 0.0  | -0.1 | -0.1  |

(D) CM charges for the Mg<sub>c</sub>Mg<sub>n</sub>Na<sub>p</sub> system.

| Index | $C_{is}$ | $(C_{cs}-C_{is})*10^{-2}$ along the reaction coordinate -----> |     |     |     |     |     |     |     |     |     |     |      |     |     |     |  |  |  |
|-------|----------|----------------------------------------------------------------|-----|-----|-----|-----|-----|-----|-----|-----|-----|-----|------|-----|-----|-----|--|--|--|
| 1     | 0.330    | 0.0                                                            | 0.1 | 0.1 | 0.1 | 0.1 | 0.2 | 0.2 | 0.3 | 0.3 | 0.3 | 0.4 | 0.4  | 0.4 | 0.5 |     |  |  |  |
| 2     | -0.588   | 0.0                                                            | 0.1 | 0.1 | 0.2 | 0.2 | 0.3 | 0.3 | 0.4 | 0.5 | 0.5 | 0.6 | 0.7  | 0.7 | 0.8 |     |  |  |  |
| 3     | 0.379    | 0.0                                                            | 0.1 | 0.1 | 0.2 | 0.3 | 0.3 | 0.4 | 0.4 | 0.4 | 0.5 | 0.5 | 0.8  | 0.7 | 0.8 |     |  |  |  |
| 4     | 0.412    | 0.0                                                            | 0.0 | 0.0 | 0.1 | 0.1 | 0.1 | 0.1 | 0.2 | 0.2 | 0.2 | 0.3 | 0.4  | 0.3 | 0.4 |     |  |  |  |
| 5     | -0.591   | 0.0                                                            | 0.1 | 0.1 | 0.1 | 0.2 | 0.2 | 0.2 | 0.2 | 0.3 | 0.4 | 0.4 | -0.2 | 0.0 | 0.0 |     |  |  |  |
| 6     | 0.374    | 0.0                                                            | 0.1 | 0.1 | 0.1 | 0.1 | 0.1 | 0.1 | 0.1 | 0.1 | 0.2 | 0.2 | 0.2  | 0.1 | 0.3 | 0.3 |  |  |  |
| 7     | 0.325    | 0.0                                                            | 0.0 | 0.0 | 0.0 | 0.0 | 0.0 | 0.0 | 0.0 | 0.0 | 0.0 | 0.0 | 0.0  | 0.0 | 0.1 | 0.1 |  |  |  |



|    |        |      |      |      |      |      |      |      |      |      |      |      |       |       |       |     |
|----|--------|------|------|------|------|------|------|------|------|------|------|------|-------|-------|-------|-----|
| 8  | -0.580 | 0.0  | 0.0  | 0.0  | 0.0  | 0.0  | 0.0  | 0.0  | 0.0  | 0.1  | 0.1  | 0.1  | 0.1   | 0.5   | 0.4   | 0.4 |
| 9  | 0.379  | 0.0  | 0.0  | 0.0  | 0.0  | 0.0  | 0.0  | 0.0  | 0.0  | 0.1  | 0.1  | 0.1  | 0.2   | 1.0   | 1.1   | 1.1 |
| 10 | 0.327  | 0.0  | 0.0  | 0.1  | 0.1  | 0.1  | 0.1  | 0.2  | 0.2  | 0.3  | 0.4  | 0.5  | 0.1   | 0.2   | 0.2   |     |
| 11 | 0.090  | 0.0  | 0.0  | 0.0  | -0.1 | -0.1 | -0.1 | -0.1 | -0.1 | -0.2 | -0.2 | -0.3 | 0.5   | 0.3   | 0.3   |     |
| 12 | -0.246 | 0.0  | 0.0  | 0.0  | 0.0  | -0.1 | -0.1 | -0.1 | -0.1 | -0.2 | -0.2 | -0.2 | 0.5   | 0.4   | 0.3   |     |
| 13 | 0.087  | 0.0  | 0.1  | 0.1  | 0.0  | 0.0  | -0.1 | -0.1 | -0.1 | -0.1 | -0.1 | -0.1 | 1.2   | 1.3   | 1.3   |     |
| 14 | 0.116  | 0.0  | 0.0  | 0.0  | 0.0  | -0.1 | -0.1 | -0.1 | -0.1 | -0.1 | -0.1 | -0.2 | -0.1  | -0.3  | -0.4  |     |
| 15 | 0.275  | -0.1 | 0.0  | 0.0  | -0.1 | -0.1 | 0.0  | 0.0  | -0.1 | -0.1 | 0.0  | 0.1  | 1.9   | 2.0   | 2.0   |     |
| 16 | -0.411 | 0.0  | -0.4 | -0.6 | -0.4 | -0.5 | -0.7 | -0.9 | -1.1 | -1.3 | -1.7 | -2.0 | 0.3   | -0.7  | -1.0  |     |
| 17 | -0.428 | 0.1  | 0.3  | 0.4  | 0.4  | 0.4  | 0.5  | 0.7  | 0.9  | 1.2  | 1.3  | 1.6  | 2.4   | 3.4   | 3.6   |     |
| 18 | 0.099  | 0.0  | 0.1  | 0.0  | -0.1 | -0.1 | -0.1 | -0.1 | -0.1 | -0.1 | -0.2 | -0.2 | 0.2   | 0.2   | 0.2   |     |
| 19 | -0.252 | 0.0  | -0.1 | -0.1 | 0.0  | 0.0  | 0.0  | 0.0  | -0.1 | -0.1 | -0.1 | -0.1 | 0.1   | 0.1   | 0.1   |     |
| 20 | 0.076  | 0.0  | 0.1  | 0.0  | 0.0  | 0.0  | 0.0  | 0.0  | 0.0  | 0.0  | 0.0  | 0.0  | 0.2   | 0.1   | 0.1   |     |
| 21 | 0.101  | 0.0  | 0.1  | 0.1  | 0.0  | 0.0  | -0.1 | -0.1 | -0.1 | -0.1 | -0.1 | -0.1 | 0.5   | 0.7   | 0.7   |     |
| 22 | 0.286  | 0.0  | 0.1  | 0.0  | 0.0  | 0.0  | -0.1 | -0.1 | -0.1 | -0.1 | -0.1 | -0.2 | 0.5   | 0.6   | 0.5   |     |
| 23 | -0.395 | -0.2 | 0.0  | 0.2  | 0.2  | 0.3  | 0.4  | 0.6  | 0.6  | 0.9  | 1.1  | 1.4  | -0.9  | 0.3   | 0.6   |     |
| 24 | -0.438 | 0.0  | -0.1 | -0.2 | -0.4 | -0.5 | -0.6 | -0.7 | -0.9 | -1.2 | -1.4 | -1.7 | 0.2   | -1.1  | -1.3  |     |
| 25 | 0.321  | 0.0  | 0.0  | 0.0  | 0.0  | 0.0  | 0.0  | 0.0  | -0.1 | -0.1 | -0.1 | -0.1 | 0.2   | 0.1   | 0.1   |     |
| 26 | -0.590 | 0.0  | 0.0  | 0.0  | 0.0  | 0.0  | 0.0  | -0.1 | -0.1 | -0.1 | -0.1 | -0.2 | 0.1   | -0.1  | -0.2  |     |
| 27 | 0.382  | 0.0  | 0.0  | 0.0  | 0.0  | 0.0  | 0.0  | 0.0  | 0.0  | 0.0  | -0.1 | -0.1 | -0.6  | -0.7  | -0.7  |     |
| 28 | 0.416  | 0.0  | 0.0  | 0.0  | 0.0  | 0.0  | 0.0  | 0.0  | 0.0  | 0.0  | 0.0  | 0.0  | -0.1  | -0.2  | -0.2  |     |
| 29 | -0.594 | 0.0  | 0.1  | 0.1  | 0.0  | 0.0  | 0.0  | 0.0  | 0.0  | 0.0  | 0.0  | 0.0  | 0.0   | -0.1  | -0.2  |     |
| 30 | 0.358  | 0.0  | 0.0  | 0.0  | 0.0  | 0.0  | -0.1 | -0.1 | -0.1 | -0.1 | -0.1 | -0.1 | 0.2   | 0.1   | 0.1   |     |
| 31 | 0.358  | 0.0  | 0.0  | 0.0  | 0.0  | 0.0  | 0.0  | 0.0  | 0.0  | -0.1 | -0.1 | -0.1 | -0.9  | -1.0  | -1.0  |     |
| 32 | -0.569 | 0.0  | 0.0  | 0.0  | 0.0  | 0.1  | 0.1  | 0.1  | 0.1  | 0.1  | 0.2  | 0.2  | -0.8  | -0.7  | -0.7  |     |
| 33 | 0.327  | 0.0  | 0.0  | 0.0  | 0.0  | 0.0  | 0.0  | 0.0  | 0.0  | 0.0  | 0.0  | 0.0  | -0.3  | -0.3  | -0.3  |     |
| 34 | 0.317  | 0.0  | 0.0  | 0.0  | 0.0  | 0.0  | 0.0  | 0.0  | 0.0  | 0.0  | 0.0  | 0.0  | -0.1  | -0.1  | -0.1  |     |
| 35 | 0.089  | 0.0  | 0.0  | -0.1 | -0.1 | -0.1 | -0.1 | -0.1 | -0.1 | -0.2 | -0.2 | -0.3 | -0.2  | -0.3  | -0.3  |     |
| 36 | -0.246 | 0.0  | 0.0  | -0.1 | 0.0  | 0.0  | -0.1 | -0.1 | -0.1 | -0.1 | -0.1 | -0.2 | -0.3  | -0.4  | -0.4  |     |
| 37 | 0.110  | 0.0  | 0.0  | -0.1 | 0.0  | 0.0  | 0.0  | 0.0  | 0.0  | -0.1 | -0.1 | -0.1 | -0.3  | -0.4  | -0.4  |     |
| 38 | 0.089  | 0.0  | 0.0  | -0.1 | -0.1 | -0.1 | 0.0  | -0.1 | -0.1 | -0.1 | -0.1 | -0.1 | 0.0   | -0.1  | -0.1  |     |
| 39 | 0.263  | 0.0  | 0.0  | 0.0  | 0.0  | 0.0  | 0.0  | 0.0  | 0.0  | 0.0  | -0.1 | -0.1 | 0.0   | -0.2  | -0.3  |     |
| 40 | -0.450 | 0.0  | 0.0  | 0.0  | 0.0  | 0.0  | 0.0  | -0.1 | -0.1 | -0.1 | -0.2 | -0.2 | 1.2   | 0.4   | 0.3   |     |
| 41 | -0.417 | 0.0  | -0.1 | 0.0  | 0.1  | 0.2  | 0.3  | 0.4  | 0.4  | 0.5  | 0.7  | 0.9  | -0.1  | 0.6   | 0.9   |     |
| 42 | 0.352  | 0.0  | 0.0  | 0.0  | 0.0  | 0.0  | 0.0  | -0.1 | -0.1 | -0.1 | -0.1 | -0.1 | 0.3   | 0.2   | 0.2   |     |
| 43 | -0.476 | 0.0  | 0.0  | 0.0  | 0.0  | -0.1 | -0.1 | -0.1 | -0.2 | -0.2 | -0.2 | -0.2 | 0.5   | 0.5   | 0.4   |     |
| 44 | 0.499  | 0.0  | -0.1 | -0.1 | -0.1 | -0.2 | -0.2 | -0.3 | -0.3 | -0.4 | -0.5 | -0.5 | 0.2   | 0.0   | -0.1  |     |
| 45 | -0.481 | -0.1 | 0.0  | -0.1 | -0.1 | -0.1 | -0.2 | -0.2 | -0.2 | -0.2 | -0.3 | -0.4 | 0.1   | 0.0   | 0.0   |     |
| 46 | -0.592 | 0.0  | 0.0  | -0.1 | -0.2 | -0.2 | -0.2 | -0.3 | -0.4 | -0.4 | -0.6 | -0.7 | -0.1  | -0.6  | -0.8  |     |
| 47 | -0.304 | 0.0  | -0.1 | -0.1 | 0.0  | 0.0  | 0.0  | 0.0  | 0.0  | 0.0  | 0.0  | 0.0  | 0.3   | 0.4   | 0.3   |     |
| 48 | -0.053 | 0.0  | 0.0  | 0.0  | 0.0  | 0.0  | 0.0  | -0.1 | 0.0  | -0.1 | -0.1 | -0.1 | 0.2   | 0.2   | 0.1   |     |
| 49 | 0.118  | 0.0  | 0.0  | -0.1 | -0.1 | -0.1 | -0.1 | -0.2 | -0.2 | -0.2 | -0.3 | -0.3 | -0.1  | -0.3  | -0.3  |     |
| 50 | 0.126  | 0.0  | 0.0  | 0.0  | 0.0  | 0.0  | 0.0  | 0.0  | 0.0  | 0.0  | -0.1 | -0.1 | -0.1  | -0.2  | -0.2  |     |
| 51 | 0.014  | 0.0  | 0.0  | 0.0  | 0.0  | -0.1 | -0.1 | -0.1 | -0.1 | -0.2 | -0.3 | -0.3 | -0.7  | -1.1  | -1.1  |     |
| 52 | 0.120  | 0.0  | 0.0  | 0.0  | 0.0  | -0.1 | -0.1 | -0.1 | -0.1 | -0.2 | -0.2 | -0.3 | -0.5  | -0.8  | -0.8  |     |
| 53 | -0.322 | 0.0  | -0.1 | -0.1 | -0.1 | -0.1 | -0.2 | -0.2 | -0.3 | -0.4 | -0.5 | -0.6 | -0.3  | -0.9  | -0.9  |     |
| 54 | -0.066 | 0.0  | -0.1 | -0.1 | -0.1 | -0.2 | -0.2 | -0.3 | -0.3 | -0.4 | -0.5 | -0.6 | -0.6  | -1.0  | -1.0  |     |
| 55 | 0.113  | 0.0  | 0.0  | -0.1 | -0.1 | -0.1 | -0.2 | -0.2 | -0.3 | -0.4 | -0.5 | -0.6 | -0.4  | -0.9  | -1.0  |     |
| 56 | 0.046  | 0.0  | -0.1 | -0.1 | -0.1 | -0.2 | -0.2 | -0.3 | -0.4 | -0.5 | -0.6 | -0.7 | -0.4  | -0.9  | -1.0  |     |
| 57 | 0.027  | 0.0  | 0.0  | 0.0  | -0.1 | -0.2 | -0.2 | -0.3 | -0.4 | -0.6 | -0.7 | -1.0 | -1.3  | -2.2  | -2.3  |     |
| 58 | 0.124  | 0.0  | 0.0  | -0.1 | -0.1 | -0.2 | -0.3 | -0.4 | -0.5 | -0.6 | -0.8 | -1.0 | -1.6  | -3.4  | -3.5  |     |
| 59 | -0.164 | 0.0  | -0.1 | -0.1 | -0.1 | -0.2 | -0.2 | -0.3 | -0.4 | -0.5 | -0.6 | -0.7 | -0.8  | -1.4  | -1.4  |     |
| 60 | 0.104  | 0.0  | -0.1 | -0.2 | -0.2 | -0.2 | -0.3 | -0.4 | -0.5 | -0.6 | -0.7 | -0.8 | -0.9  | -1.4  | -1.4  |     |
| 61 | 0.107  | 0.0  | 0.0  | 0.0  | -0.1 | -0.1 | -0.2 | -0.2 | -0.2 | -0.3 | -0.4 | -0.5 | -0.6  | -1.2  | -1.2  |     |
| 62 | -0.292 | -0.3 | -0.7 | -1.1 | -1.3 | -1.7 | -2.3 | -2.9 | -3.8 | -4.7 | -5.6 | -7.1 | -13.2 | -22.8 | -23.7 |     |
| 63 | 0.550  | -0.1 | -0.2 | -0.2 | -0.2 | -0.2 | -0.1 | 0.0  | 0.1  | 0.1  | 0.1  | 0.1  | 0.9   | 2.7   | 2.4   |     |
| 64 | -0.484 | 0.0  | 0.2  | 0.1  | -0.2 | -0.3 | -0.5 | -0.9 | -1.2 | -1.7 | -2.1 | -2.8 | -2.0  | 1.5   | 0.5   |     |
| 65 | -0.527 | -0.6 | -1.0 | -1.2 | -1.2 | -1.5 | -1.8 | -2.1 | -2.5 | -3.0 | -3.4 | -3.7 | -0.5  | 2.2   | 1.0   |     |
| 66 | -0.280 | 0.0  | 0.1  | 0.1  | 0.1  | 0.0  | 0.0  | -0.1 | -0.2 | -0.3 | -0.4 | -0.6 | -0.7  | 0.0   | -0.4  |     |

|     |        |      |      |      |      |      |      |      |      |      |      |      |       |       |       |
|-----|--------|------|------|------|------|------|------|------|------|------|------|------|-------|-------|-------|
| 67  | -0.034 | 0.0  | 0.0  | 0.1  | 0.2  | 0.2  | 0.2  | 0.2  | 0.2  | 0.2  | 0.1  | 0.1  | -0.4  | -0.3  | -0.6  |
| 68  | 0.125  | 0.0  | 0.0  | 0.0  | 0.1  | 0.1  | 0.1  | 0.1  | 0.1  | 0.1  | 0.1  | 0.1  | 0.1   | 0.6   | 0.5   |
| 69  | 0.126  | 0.0  | 0.0  | 0.1  | 0.0  | 0.0  | 0.0  | -0.1 | -0.1 | -0.2 | -0.3 | -0.4 | -0.1  | -0.3  | -0.4  |
| 70  | 0.005  | 0.0  | 0.0  | 0.0  | 0.0  | 0.0  | 0.0  | 0.0  | 0.0  | 0.0  | 0.0  | 0.0  | 0.0   | -0.1  | 0.0   |
| 71  | 0.117  | -0.1 | 0.0  | 0.0  | -0.1 | -0.1 | -0.1 | -0.1 | -0.1 | -0.1 | -0.1 | -0.2 | -0.2  | 0.3   | 0.3   |
| 72  | -0.271 | 0.0  | 0.0  | 0.1  | 0.1  | 0.2  | 0.2  | 0.3  | 0.3  | 0.4  | 0.4  | 0.5  | 0.2   | 0.3   | 0.3   |
| 73  | -0.063 | 0.0  | 0.0  | 0.0  | 0.0  | 0.0  | 0.1  | 0.1  | 0.1  | 0.1  | 0.1  | 0.1  | 0.1   | 0.2   | 0.2   |
| 74  | 0.116  | 0.0  | 0.0  | 0.0  | 0.0  | 0.0  | 0.0  | 0.0  | 0.1  | 0.1  | 0.1  | 0.1  | 0.1   | 0.2   | 0.3   |
| 75  | 0.040  | 0.0  | 0.0  | 0.0  | 0.0  | 0.0  | 0.0  | 0.0  | 0.0  | 0.0  | 0.0  | 0.0  | 0.0   | 0.1   | 0.0   |
| 76  | -0.001 | 0.0  | 0.0  | -0.1 | -0.1 | -0.1 | -0.2 | -0.2 | -0.2 | -0.3 | -0.3 | -0.4 | -0.2  | -0.3  | -0.4  |
| 77  | 0.116  | 0.0  | 0.0  | -0.1 | 0.0  | -0.1 | -0.1 | -0.1 | -0.2 | -0.3 | -0.3 | -0.4 | -0.6  | -0.7  | -0.8  |
| 78  | -0.176 | 0.0  | 0.0  | 0.0  | 0.0  | 0.0  | 0.0  | 0.0  | 0.0  | -0.1 | -0.1 | -0.1 | 0.2   | 0.2   | 0.2   |
| 79  | 0.097  | 0.0  | 0.0  | 0.0  | 0.0  | 0.0  | 0.0  | 0.0  | 0.0  | -0.1 | -0.1 | -0.1 | -0.1  | 0.0   | 0.0   |
| 80  | 0.105  | 0.0  | 0.0  | 0.0  | 0.0  | 0.0  | 0.0  | 0.1  | 0.1  | 0.1  | 0.1  | 0.1  | 0.2   | 0.3   | 0.3   |
| 81  | -0.477 | -0.1 | -0.1 | -0.1 | -0.1 | -0.2 | -0.2 | -0.2 | -0.2 | -0.3 | -0.3 | -0.3 | 0.8   | 0.7   | 0.7   |
| 82  | 0.305  | 0.0  | 0.0  | -0.1 | 0.0  | -0.1 | -0.1 | 0.0  | 0.0  | 0.0  | 0.0  | 0.1  | 0.8   | 0.7   | 0.8   |
| 83  | -0.434 | 0.0  | 0.0  | 0.0  | 0.0  | 0.0  | 0.0  | 0.0  | 0.0  | 0.1  | 0.1  | 0.2  | 0.6   | 1.1   | 1.1   |
| 84  | 0.390  | 0.0  | 0.0  | 0.1  | 0.1  | 0.1  | 0.1  | 0.1  | 0.2  | 0.2  | 0.2  | 0.3  | 1.3   | 1.6   | 1.6   |
| 85  | 0.523  | 0.1  | 0.1  | 0.1  | 0.3  | 0.3  | 0.4  | 0.4  | 0.5  | 0.6  | 0.8  | 0.9  | 0.5   | 0.8   | 0.9   |
| 86  | -0.449 | 0.1  | 0.1  | 0.2  | 0.1  | 0.2  | 0.3  | 0.4  | 0.5  | 0.6  | 0.8  | 1.1  | -2.0  | -1.1  | -0.7  |
| 87  | -0.634 | 0.0  | -0.2 | -0.2 | 0.2  | 0.3  | 0.4  | 0.5  | 0.6  | 0.7  | 0.9  | 1.1  | 0.7   | 1.4   | 1.6   |
| 88  | -0.352 | 0.1  | 0.2  | 0.2  | 0.2  | 0.3  | 0.3  | 0.4  | 0.6  | 0.7  | 0.8  | 1.0  | 1.9   | 2.2   | 2.3   |
| 89  | 0.499  | 0.0  | 0.2  | 0.1  | 0.0  | 0.2  | 0.4  | 0.7  | 1.2  | 1.9  | 2.6  | 3.5  | 5.1   | 6.8   | 7.8   |
| 90  | -0.538 | -0.2 | -0.2 | -0.4 | -0.5 | -0.5 | -0.4 | -0.4 | -0.2 | 0.0  | 0.5  | 0.9  | 1.6   | 3.3   | 3.9   |
| 91  | -0.515 | 0.0  | 0.0  | -0.1 | -0.1 | -0.1 | 0.0  | 0.0  | 0.0  | 0.1  | 0.3  | 0.5  | 1.4   | 2.5   | 2.9   |
| 92  | -0.507 | 0.8  | 0.8  | 1.7  | 2.6  | 3.3  | 4.3  | 5.4  | 6.9  | 8.2  | 9.9  | 12.0 | 12.0  | 16.7  | 18.3  |
| 93  | 0.735  | 0.5  | 1.5  | 1.3  | 1.0  | 1.5  | 1.4  | 1.5  | 1.7  | 2.0  | 2.0  | 1.7  | 2.2   | 2.5   | 2.4   |
| 94  | 0.870  | -0.1 | 0.1  | 0.0  | -0.2 | -0.3 | -0.4 | -0.5 | -0.6 | -0.7 | -1.0 | -1.2 | 3.4   | 0.8   | 0.5   |
| 95  | 0.842  | 0.2  | 0.1  | 0.2  | 0.4  | 0.5  | 0.7  | 0.8  | 1.0  | 1.2  | 1.4  | 1.5  | 2.1   | 2.1   | 2.2   |
| 96  | -0.582 | -0.1 | 0.1  | 0.1  | -0.3 | -0.2 | -0.3 | -0.4 | -0.3 | -0.4 | -0.7 | -1.4 | -12.1 | -12.7 | -12.2 |
| 97  | 0.328  | 0.0  | 0.0  | 0.0  | 0.1  | 0.1  | 0.1  | 0.1  | 0.1  | 0.1  | 0.1  | 0.2  | -1.0  | -1.0  | -0.9  |
| 98  | 0.370  | 0.0  | -0.1 | 0.0  | 0.1  | 0.0  | 0.1  | 0.1  | 0.2  | 0.1  | 0.1  | 0.3  | 0.1   | 0.3   | 0.4   |
| 99  | -0.636 | 0.1  | -0.3 | -0.2 | 0.0  | 0.0  | 0.1  | 0.2  | 0.2  | 0.2  | 0.4  | 0.7  | -11.4 | -11.5 | -11.5 |
| 100 | 0.317  | 0.1  | 0.0  | 0.0  | 0.0  | -0.1 | -0.1 | -0.1 | -0.2 | -0.2 | -0.2 | -0.2 | -3.5  | -3.5  | -3.5  |
| 101 | 0.323  | 0.0  | -0.1 | 0.0  | 0.0  | -0.1 | -0.1 | -0.1 | -0.1 | -0.1 | -0.1 | 0.0  | -2.8  | -2.8  | -2.7  |
| 102 | -0.606 | 0.0  | -0.3 | -0.3 | -0.1 | -0.2 | -0.2 | -0.3 | -0.3 | -0.4 | -0.4 | -0.5 | -0.7  | -0.9  | -0.9  |
| 103 | 0.365  | 0.2  | 0.0  | 0.1  | 0.1  | 0.1  | 0.1  | 0.2  | 0.3  | 0.3  | 0.2  | 0.1  | 1.5   | 1.6   | 1.5   |
| 104 | 0.369  | 0.1  | -0.3 | -0.2 | 0.0  | 0.1  | 0.1  | 0.1  | 0.1  | 0.1  | 0.2  | 0.2  | -0.3  | -0.1  | -0.1  |
| 105 | -0.702 | 0.2  | 0.0  | 0.0  | 0.1  | 0.0  | 0.0  | -0.1 | -0.1 | -0.3 | -0.4 | -0.6 | 2.9   | 3.2   | 3.4   |
| 106 | 0.355  | -0.1 | 0.0  | 0.0  | 0.0  | 0.0  | 0.0  | 0.0  | 0.0  | 0.0  | 0.0  | 0.0  | 0.8   | 0.6   | 0.7   |
| 107 | 0.308  | -0.1 | 0.1  | 0.1  | 0.0  | 0.0  | -0.1 | -0.1 | -0.1 | 0.0  | 0.0  | 0.0  | 4.9   | 5.4   | 5.1   |
| 108 | -0.669 | 0.3  | -0.3 | -0.1 | 0.2  | 0.0  | 0.2  | 0.4  | 0.4  | 0.3  | 0.5  | 1.0  | -0.9  | -0.7  | -0.7  |
| 109 | 0.345  | 0.0  | 0.0  | 0.0  | 0.0  | 0.1  | 0.1  | 0.1  | 0.2  | 0.2  | 0.2  | 0.1  | 0.7   | 1.0   | 1.1   |
| 110 | 0.352  | -0.1 | 0.1  | 0.1  | 0.0  | 0.1  | 0.0  | 0.0  | 0.0  | 0.0  | 0.0  | -0.2 | 0.8   | 1.1   | 1.0   |
| 111 | -0.671 | -0.4 | 0.2  | 0.2  | 0.1  | 0.1  | 0.2  | 0.0  | -0.4 | -0.2 | -0.3 | -0.4 | 0.6   | -0.5  | -0.7  |
| 112 | 0.357  | 0.0  | 0.0  | 0.0  | 0.0  | 0.0  | 0.0  | 0.1  | 0.2  | 0.3  | 0.3  | 0.4  | 0.2   | 0.5   | 0.6   |
| 113 | 0.367  | -0.1 | 0.1  | 0.1  | 0.1  | 0.1  | 0.1  | 0.1  | 0.2  | 0.3  | 0.3  | 0.3  | 0.7   | 1.0   | 1.1   |

(E) Atom identities of QM atoms (Fig. S2) for  $\text{Na}_c\text{Mg}_n\text{Mg}_p$ . Amber atom names, residue names, and residue numbers (crystallographic numbering is used) are given.  $\text{Me}_n = 93$ ,  $\text{Me}_c = 94$ , and  $\text{Me}_p = 95$ . Note that atom 94 is Mg for the  $\text{Mg}_c\text{Mg}_n\text{Mg}_p$  and  $\text{Mg}_c\text{Mg}_n$  systems. For the  $\text{Mg}_c\text{Mg}_n$  system, the first water index begins at 95.

| Index | Name | ResID   | Index | Name | ResID   | Index | Name | ResID   |
|-------|------|---------|-------|------|---------|-------|------|---------|
| 1     | CD   | ARG-183 | 39    | CG   | ASP-256 | 77    | H3'  | DC3-362 |
| 2     | NE   | ARG-183 | 40    | OD1  | ASP-256 | 78    | C2'  | DC3-362 |
| 3     | HE   | ARG-183 | 41    | OD2  | ASP-256 | 79    | H2'  | DC3-362 |
| 4     | CZ   | ARG-183 | 42    | C3'  | DG -360 | 80    | H2'' | DC3-362 |
| 5     | NH1  | ARG-183 | 43    | O3'  | DG -360 | 81    | O3'  | DC3-362 |
| 6     | HH11 | ARG-183 | 44    | P    | DC -361 | 82    | HO3' | DC3-362 |
| 7     | HH12 | ARG-183 | 45    | OP1  | DC -361 | 83    | O21  | PPV-369 |
| 8     | NH2  | ARG-183 | 46    | OP2  | DC -361 | 84    | H21  | PPV-369 |
| 9     | HH21 | ARG-183 | 47    | O5'  | DC -361 | 85    | P1   | PPV-369 |
| 10    | HH22 | ARG-183 | 48    | C5'  | DC -361 | 86    | O11  | PPV-369 |
| 11    | CA   | ASP-190 | 49    | H5'  | DC -361 | 87    | O31  | PPV-369 |
| 12    | CB   | ASP-190 | 50    | H5'' | DC -361 | 88    | OPP  | PPV-369 |
| 13    | HB2  | ASP-190 | 51    | C4'  | DC -361 | 89    | P2   | PPV-369 |
| 14    | HB3  | ASP-190 | 52    | H4'  | DC -361 | 90    | O22  | PPV-369 |
| 15    | CG   | ASP-190 | 53    | O4'  | DC -361 | 91    | O32  | PPV-369 |
| 16    | OD1  | ASP-190 | 54    | C1'  | DC -361 | 92    | O12  | PPV-369 |
| 17    | OD2  | ASP-190 | 55    | H1'  | DC -361 | 93    | Mg   | Mg -370 |
| 18    | CA   | ASP-192 | 56    | N1   | DC -361 | 94    | Na   | Na -371 |
| 19    | CB   | ASP-192 | 57    | C3'  | DC -361 | 95    | Mg   | Mg -372 |
| 20    | HB2  | ASP-192 | 58    | H3'  | DC -361 | 96    | O    | WAT-W01 |
| 21    | HB3  | ASP-192 | 59    | C2'  | DC -361 | 97    | H1   | WAT-W01 |
| 22    | CG   | ASP-192 | 60    | H2'  | DC -361 | 98    | H2   | WAT-W01 |
| 23    | OD1  | ASP-192 | 61    | H2'' | DC -361 | 99    | O    | WAT-W02 |
| 24    | OD2  | ASP-192 | 62    | O3'  | DC -361 | 100   | H1   | WAT-W02 |
| 25    | CD   | ARG-254 | 63    | P    | DC3-362 | 101   | H2   | WAT-W02 |
| 26    | NE   | ARG-254 | 64    | OP1  | DC3-362 | 102   | O    | WAT-W03 |
| 27    | HE   | ARG-254 | 65    | OP2  | DC3-362 | 103   | H1   | WAT-W03 |
| 28    | CZ   | ARG-254 | 66    | O5'  | DC3-362 | 104   | H2   | WAT-W03 |
| 29    | NH1  | ARG-254 | 67    | C5'  | DC3-362 | 105   | O    | WAT-W04 |
| 30    | HH11 | ARG-254 | 68    | H5'  | DC3-362 | 106   | H1   | WAT-W04 |
| 31    | HH12 | ARG-254 | 69    | H5'' | DC3-362 | 107   | H2   | WAT-W04 |
| 32    | NH2  | ARG-254 | 70    | C4'  | DC3-362 | 108   | O    | WAT-W05 |
| 33    | HH21 | ARG-254 | 71    | H4'  | DC3-362 | 109   | H1   | WAT-W05 |
| 34    | HH22 | ARG-254 | 72    | O4'  | DC3-362 | 110   | H2   | WAT-W05 |
| 35    | CA   | ASP-256 | 73    | C1'  | DC3-362 | 111   | O    | WAT-W06 |
| 36    | CB   | ASP-256 | 74    | H1'  | DC3-362 | 112   | H1   | WAT-W06 |
| 37    | HB2  | ASP-256 | 75    | N1   | DC3-362 | 113   | H2   | WAT-W06 |
| 38    | HB3  | ASP-256 | 76    | C3'  | DC3-362 |       |      |         |

**Figure S1:** Optimization of the unconstrained  $\text{Na}_c\text{Mg}_n\text{Mg}_p$  system at  $\text{P}_\alpha\text{-O}_\beta = 1.7 \text{ \AA}$  yielded a configuration similar to the one used in the start of the calculations (open triangle).

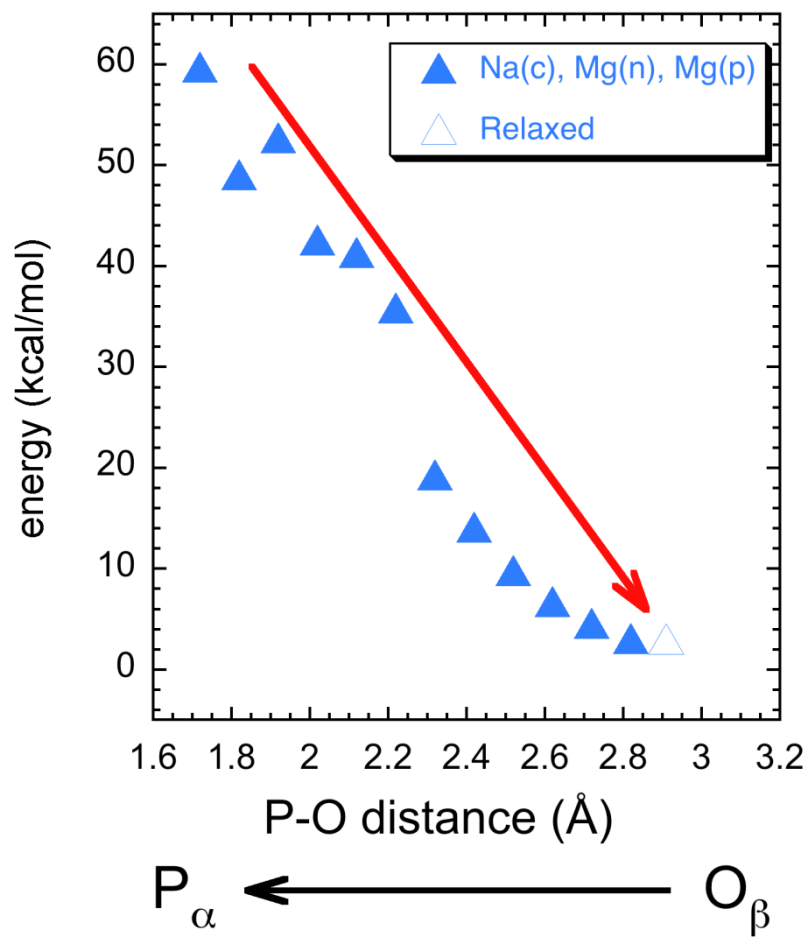

**Figure S2:** Charge variations (the difference between the charge at current state and the charge at initial state) of the QM atoms as a function of the reaction coordinate for the systems studied. The reaction coordinate of the  $P_\alpha$ - $O_\beta$  distance ( $\text{\AA}$ ) is given outside the y-axis. Tick marks for the charge variation (given on the inside of the y-axis) are spaced at  $0.25e$  where “e” is the electron charge. The atom identities (given as atom numbers on the x-axis) are tabulated in Table S1E and the charges calculated using the CM5 charge method (35).

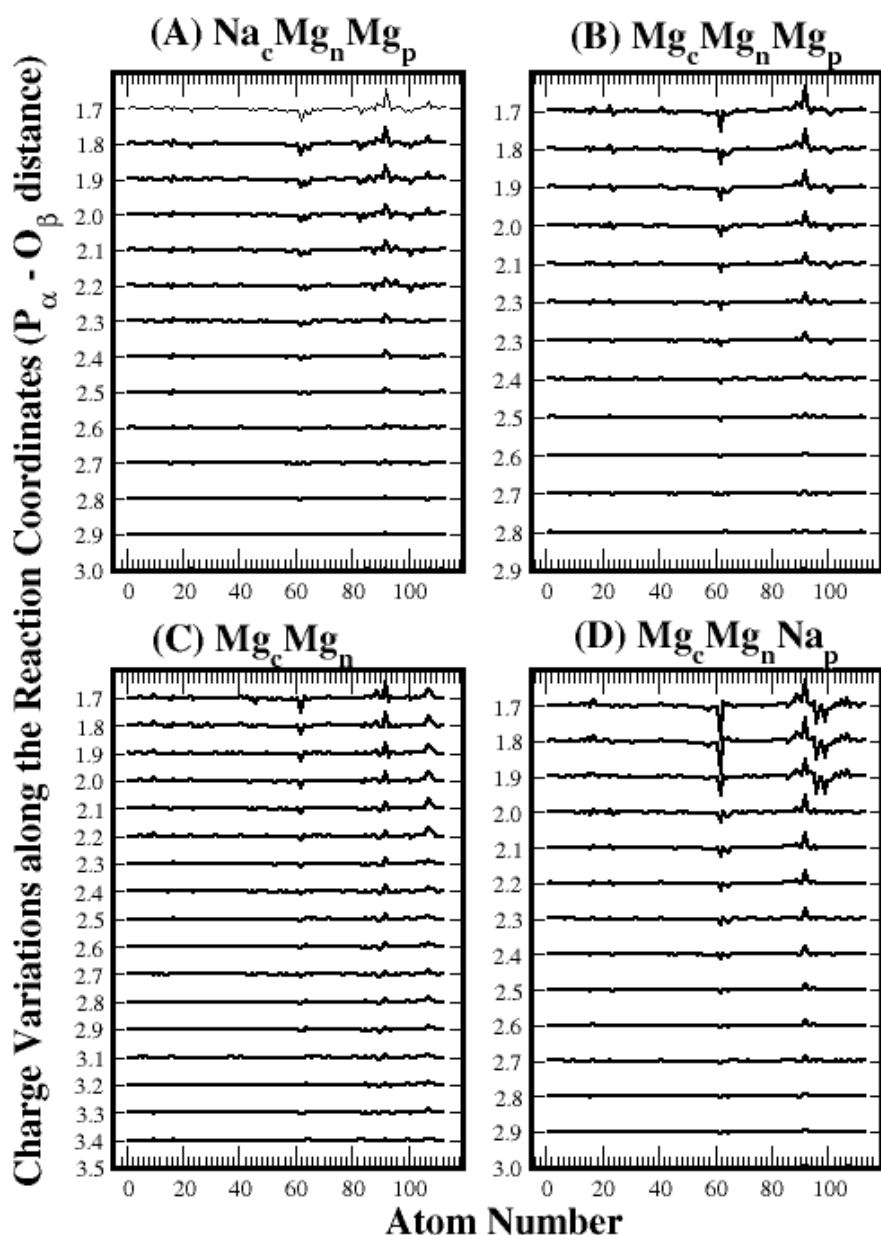

Supplement: pnas.1511207112.sapp.pdf [file pnas.1511207112.sapp.pdf]
